# Supplementary material
Source: MDPI journal article supplement (https://www.mdpi.com/1424-2818/14/8/677)
Supplement: s1 [file s1]

Archive with 5 entries (5 files):
- Figure S1.pdf
- Supplementary Material S1 (ndhF-trnL+trnS-G).txt
- Supplementary Material S2 (ITS).txt
- Table S1.pdf
- Table S2.pdf
