# Supplementary material
Source: MDPI journal article supplement (https://www.mdpi.com/1424-2818/14/8/677)
Supplement: s1 [file s1 › Supplementary Material S1 (ndhF-trnL+trnS-G).txt]

#NEXUS
BEGIN DATA;
	DIMENSIONS NTAX=85 NCHAR=1930;
	FORMAT DATATYPE = DNA GAP = - MISSING = ?;
	MATRIX
	Barleria_acanthoides TTAATTAATTGGTTCGGATTCGCCGGATCTTTCCTCTTTTGAAAAGACTGAACAAAAGGGTAAAGATATGCATAAAGTTAACCGAACTTAACTACAATTTTTGGATTGGAATTTCTTTTTATTCTTATTCATTCTTAGTTTCTGCTAAATACTTCAAATATTCAAACCAAGAAGTTCCAGTTGGTCAAATGAAAGAGATTGGATTACCAGTCCACTTCAAATTTTGAAATTCAAGTCAAATTAGGCATATTTTTCTTGAGTAAAAGAAATTACTAAAAAAGAAGAATATTCTTCTTTTAGTAATTTCTTTTACTCTAATTTTCCATTTATCTCACTTATCTTATCTATTCTTTTTCTTTTCGATTTGTAGAAAAAATA…
	Barleria_aff__dulcis TTAATTAATTGGTTCGGATTCGCCGGATCT?????????TGAAAAGACTCAACAAAAGGGTAAAGATATGCACTAAGTTAACCGAACTTAACTAAAATTTTTGGATTGGAATTTCTTTTTATTCTTATTCATTCTTAGTTTCTGCTAAATACTTCAAATATTCAAACCAAGAAGTTCCAGTTGGTCAAATGAAAGAGATTGGATTACCAGTCCACTTCAAATTTTGAAATTCAAGTCAAATTAGGCATATTTTTCTTGAGTAAAAGAAATTACTAAAAAAGAAGAATATTCTTCTTTTAGTAATTTCTTTTACTCTAATTTTCCATTTATCTCACTTATCTTATCTATTCTTTTTCTTTTCGATTTGTAGAAAAAATA…
	Barleria_argentea TTAATTAATTGTTTCCGATTCGCCGGATCTTACCTCTTTTGAAAGGACTCAACAAAAGGGTAAAGATATGCACTAAGTTAACCGAACTTAACTAGAATTTTTGGATTTGAATTTCTTTTTATACTTATTCATTCTTAGTTTCTGCTAAATACTTCAAATATTCAAACCAAGAAGTTCCAGTTGGTCAACTGAAAGAGATTGGATTACCAGTCCACTTCAAATTTTGAAATTCAAGTCAAATTAGGCATATTTTTCTTGAGTTTAAGAAATTACTAAAAAAGAAGAATATTCTTCTTTTAGTAATTTCTTTTACTATAATTTTCTGTTTATCTCACTTATCTTATCTATTCTTTTTCTTTTCGATTTGTAGAAAAAATATTA…
	Barleria_argillicola TTAATTAATTGGTTCGGATTCGCCGGATCTTTCCTCTTTTGAAAAGACTCAACAAAAGGGTAAAGATATGCATAAAGTTAACCGAACTTAACTAGAATTTTTGGATTGGAATTTCTTTTTATTCTTATTCATTCTTAGTTTCTGCTAAATACTTCAAATATTCAAACCAAGAAGTTCCAGTTGGTCAAATGAAAGAGATTGGATTACCAGTCCACTTCAAATTTTGAAATTCAAGTCAAATTAGGCATATTTTTCTTGAGTAAAAGAAATTACTAAAAAAGAAGAATATTCTTCTTTTAGTAATTTCTTTTACTCTAATTTTCCATTTATCTCACTTATCTTATCTATTCTTTTTCTTTTCGATTTGTAGAAAAAATA…
	Barleria_aristata TTAATTAATTGTTTCCGATTCGCCGGATCTTACCTCT??TGAAAGGACTCAACAAAAGGGTAAAGATATGCACTAAGTTAACCGAACTTAACTAGAATTTTTGGATTTGAATTTCTTTTTATACTTATTCATTCTTAGTTTCTGCTAAATACTTCAAATATTCAAACCAAGAAGTTCCAGTTGGTCAACTGAAAGAGATTGGATTACCAGTCCACTTCAAATTTTCAAATTCAAGTAAAATTAGGCATATTTTTCTTGAGTTTAAGAAATTACTAAAAAAGAAGAATATTCTTCTTTTAGTAATTTCTTTTACTGTAATTTTCCATTTATCTCATTTATCTTATCTATTCTTTTTCTTTTCGATTTGTAGAAAAAATATTA…
	Barleria_aucheriana TTAATTAATTGTTTCCGATTCGCCGGATCTTACCTCT???GAAAGGACTCAACAAAAGGGTAAAGATATGCACTAAGTTAACCGAACTTAACTAGAATTTTTGGATTTGAATTTCTTTTTATACTTATTCATTCTTAGTTTCTGCTAAATACTTCAAATATTCAAACCAAGAAGTTCCAGTTGGTCAACTGAAAGAGATTGGATTACCAGTCCACTTCAAATTTTGAAATTCAAGTCAAATTAGGCATATTTTTCTTGAGTTTAAGAAATTACTAAAAAAGAAGAATATCCTTCTTTTAGTAATTTCTTTTACTATAATTTTCTGTTTATCTCACTTATCTTATCTATTCTTTTTCTTTTCGATTTGTAGAAAAAATAT…
	Barleria_baluganii TTAATTAATTGGTTCGGATTTGCCAGATCTTTCCTCTTTTGAAAAGACTCAACAAAAGGGTAAAGATATGCACTAAGTTAACCGAACTTAACTAGAATTTTTGGATTGGAATTTCTTTTTATTCTTATTCATTCTTAGTTTCTGCTAAATACTTCAAATATTCAAACCAAGAAGTTCCAGTTGGTCAAATGAAAGAGATTGGATTACCAGTCCACTTCAAATTTTGAAATTCAAGTCAAATTAGGCATATT----------------------------------------------------TTTCTTTTACTCAAATTTTCCATTTATCTCACTTATCTTATCTATTCTTTTTCTTTTCGATTTGTAGAAAAAATATT…
	Barleria_bispinosa TTAATTAATTGGTTCGGATTCGCCGGATCTTT??TC???TGAAAAGACTCAACAAAAGGGTAAAGATATGCATAAAGTTAACCGAACTTAACTAGAATTTTTGGATTGGAATTTCTTTTTATTCTTATTCATTCTTAGTTTCTGCTAAATACTTCAAATATTCAAACCAAGAAGTTCCAGTTGGTCAAATGAAAGAGATTGGATTACCAGTCCACTTCAAATTTTGAAATTCAAGTCAAATTAGGCATATTTTTCTTGAGTAAAAGAAATTACTAAAAAAGAAGAATATTCTTCTTTTAGTAATTTCTTTTACTCTAATTTTCCATTTATCTCACTTATCTTATCTATTCTTTTTCTTTTCGATTTGTAGAAAAAATATT…
	Barleria_boehmii TTAATTAATTGGTTCGGATTTGCCAGATCTTTCCTCTTTTGAAAAGACTCAACAAAAGGGTAAAGATATGCACTAAGTTAACCGAACTTAACTAGAATTTTTGGATTGGAATTTCTTTTTATTCTTATTCATTCTTAGTTTCTGCTAAATACTTTAAATATTCAAACCAAGAAGTTCCAGTTGGTCAAATGAAAGAGATTGGATTACCAGTCCACTTCAAATTTTGAAATTCAAGTCAAATTAGGCATATTTTTCTTGAGTAAAAGAAATTACTAAAAAAGAAGAATATTCTTCTTTTAGTAATTTCTTTTACTCAAATTTTCCATTTATCTCA-----CTTATCTATTCTTTTTCTTTTCGATTTGTAGAAAAAATATTAT…
	Barleria_bolusii TTAATTAATTGGTTCGGATTCGCCGGATCTTTCCTCTTTTGAAAAGACTCAACAAAAGGGTAAAGATATGCATAAAGTTAACCGAACTTAACTAGAATTTTTGGATTGGAATTTCTTTTTATTCTTATTCATTCTTAGTTTCTGCTAAATACTTCAAATATTCAAACCAAGAAGTTCCAGTTGGTCAAATGAAAGAGATTGGATTACCAGTCCACTTCAAATTTTGAAATTCAAGTCAAATTAGGCATATTTTTCTTGAGTAAAAGAAATTACTAAAAAAGAAGAATATTCTTCTTTTAGTAATTTCTTTTACTCTAATTTTCCATTTATCTCACTTATCTTATCTATTCTTTTTCTTTTCGATTTGTAGAAAAAATATTCT…
	Barleria_bremekampii TTAATTAATTGGTTCGGATTCGCCGGATCTTTCCTCTTTTGAAAAGACTCAACAAAAGGGTAAAGATATGCATAAAGTTAACCGAACTTAACTAGAATTTTTGGATTGGAATTTCTTTTTATTCTTATTCATTCTTAGTTTCTGCTAAATACTTCAAATATTCAAACCAAGAAGTTCCAGTTGGTCAAATGAAAGAGATTGGATTACCAGTCCACTTCAAATTTTGAAATTCAAGTCAAATTAGGCATATTTTTCTTGAGTAAAAGAAATTACTAAAAAAGAAGAATATTCTTCTTTTAGTAATTTCTTTTACTCTAATTTTCCATTTATCTCACTTATCTTATCTATTCTTTTTCTTTTCGATTTGTAGAAAAAATA…
	Barleria_cristata__Cultivated_form_1___SSP_024_ TTAATTAATTGGTTCGGATTCGCCGGATCTTTCCTCTTTTGAAAAGACTCAACAAAAGGGTAAAGATATACATAAAGTTAACCGAACTTAACTAGAATTTTTGGATTGGAATTTCTTTTTATTCTTATTCATTCTTAGTTTCTGCTAAATACTTCAAATATTCAAACCAAGAAGTTCCAGTTGGTCAAATGAAAGAGATTGGATTACCAGTCCACTTAAAATTTTGAAATTCAAGTCAAATTAGGCATATTTTTCTTGAGTAAAAGAAATTACTAAAAAAGAAGAATATTCTTTTTTTAGTAATTTCTTTTACTCAAATTTTCCATTTATCTCACTTATCTTATCTATTCT…
	Barleria_cristata__Cultivated_form_1___SSP_058_ TTAATTAATTGGTTCGGATTCGCCGGATCTTTCCTCTTTTGAAAAGACTCAACAAAAGGGTAAAGATATACATAAAGTTAACCGAACTTAACTAGAATTTTTGGATTGGAATTTCTTTTTATTCTTATTCATTCTTAGTTTCTGCTAAATACTTCAAATATTCAAACCAAGAAGTTCCAGTTGGTCAAATGAAAGAGATTGGATTACCAGTCCACTTAAAATTTTGAAATTCAAGTCAAATTAGGCATATTTTTCTTGAGTAAAAGAAATTACTAAAAAAGAAGAATATTCTTTTTTTAGTAATTTCTTTTACTCAAATTTTCCATTTATCTCACTTATCTTATCTATTCT…
	Barleria_cristata__Cultivated_form_1___SSP_079_ TTAATTAATTGGTTCGGATTCGCCGGATCTTTCCTCTTTTGAAAAGACTCAACAAAAGGGTAAAGATATACATAAAGTTAACCGAACTTAACTAGAATTTTTGGATTGGAATTTCTTTTTATTCTTATTCATTCTTAGTTTCTGCTAAATACTTCAAATATTCAAACCAAGAAGTTCCAGTTGGTCAAATGAAAGAGATTGGATTACCAGTCCACTTAAAATTTTGAAATTCAAGTCAAATTAGGCATATTTTTCTTGAGTAAAAGAAATTACTAAAAAAGAAGAATATTCTTTTTTTAGTAATTTCTTTTACTCAAATTTTCCATTTATCTCACTTATCTTATCTATTCT…
	Barleria_cristata__Cultivated_form_1___SSP_132_ TTAATTAATTGGTTCGGATTCGCCGGATCTTTCCTCTTTTGAAAAGACTCAACAAAAGGGTAAAGATATACATAAAGTTAACCGAACTTAACTAGAATTTTTGGATTGGAATTTCTTTTTATTCTTATTCATTCTTAGTTTCTGCTAAATACTTCAAATATTCAAACCAAGAAGTTCCAGTTGGTCAAATGAAAGAGATTGGATTACCAGTCCACTTAAAATTTTGAAATTCAAGTCAAATTAGGCATATTTTTCTTGAGTAAAAGAAATTACTAAAAAAGAAGAATATTCTTTTTTTAGTAATTTCTTTTACTCAAATTTTCCATTTATCTCACTTATCTTATCTATTCT…
	Barleria_cristata__Cultivated_form_2___SSP_042_ TTAATTAATTGGTTCGGATTCGCCGGATCTTTCCTCTTTTGAAAAGACTCAACAAAAGGGTAAAGATATACATAAAGTTAACCGAACTTAACTAGAATTTTTGGATTGGAATTTCTTTTTATTCTTATTCATTCTTAGTTTCTGCTAAATACTTCAAATATTCAAACCAAGAAGTTCCAGTTGGTCAAATGAAAGAGATTGGATTACCAGTCCACTTCAAATTTTGAAATTCAAGTCAAATTAGGCATATTTTTCTTGAGTAAAAGAAATTACTAAAAAAGAAGAATATTCTTTTTTTAGTAATTTCTTTTACTCAAATTTTCCATTTATCTCACTTATCTTATCTATTCT…
	Barleria_cristata__Cultivated_form_2___SSP_062_ TTAATTAATTGGTTCGGATTCGCCGGATCTTTCCTCTTTTGAAAAGACTCAACAAAAGGGTAAAGATATACATAAAGTTAACCGAACTTAACTAGAATTTTTGGATTGGAATTTCTTTTTATTCTTATTCATTCTTAGTTTCTGCTAAATACTTCAAATATTCAAACCAAGAAGTTCCAGTTGGTCAAATGAAAGAGATTGGATTACCAGTCCACTTCAAATTTTGAAATTCAAGTCAAATTAGGCATATTTTTCTTGAGTAAAAGAAATTACTAAAAAAGAAGAATATTCTTTTTTTAGTAATTTCTTTTACTCAAATTTTCCATTTATCTCACTTATCTTATCTATTCT…
	Barleria_cristata__Cultivated_form_2___SSP_071_ TTAATTAATTGGTTCGGATTCGCCGGATCTTTCCTCTTTTGAAAAGACTCAACAAAAGGGTAAAGATATACATAAAGTTAACCGAACTTAACTAGAATTTTTGGATTGGAATTTCTTTTTATTCTTATTCATTCTTAGTTTCTGCTAAATACTTCAAATATTCAAACCAAGAAGTTCCAGTTGGTCAAATGAAAGAGATTGGATTACCAGTCCACTTCAAATTTTGAAATTCAAGTCAAATTAGGCATATTTTTCTTGAGTAAAAGAAATTACTAAAAAAGAAGAATATTCTTTTTTTAGTAATTTCTTTTACTCAAATTTTCCATTTATCTCACTTATCTTATCTATTCT…
	Barleria_cristata__Cultivated_form_2___SSP_135_ TTAATTAATTGGTTCGGATTCGCCGGATCTTTCCTCTTTTGAAAAGACTCAACAAAAGGGTAAAGATATACATAAAGTTAACCGAACTTAACTAGAATTTTTGGATTGGAATTTCTTTTTATTCTTATTCATTCTTAGTTTCTGCTAAATACTTCAAATATTCAAACCAAGAAGTTCCAGTTGGTCAAATGAAAGAGATTGGATTACCAGTCCACTTCAAATTTTGAAATTCAAGTCAAATTAGGCATATTTTTCTTGAGTAAAAGAAATTACTAAAAAAGAAGAATATTCTTTTTTTAGTAATTTCTTTTACTCAAATTTTCCATTTATCTCACTTATCTTATCTATTCT…
	Barleria_cristata__Cultivated_form_3___SSP_040_ TTAATTAATTGGTTCGGATTCGCCGGATCTTTCCTCTTTTGAAAAGACTCAACAAAAGGGTAAAGATATACATAAAGTTAACCGAACTTAACTAGAATTTTTGGATTGGAATTTCTTTTTATTCTTATTCATTCTTAGTTTCTGCTAAATACTTCAAATATTCAAACCAAGAAGTTCCAGTTGGTCAAATGAAAGAGATTGGATTACCAGTCCACTTCAAATTTTGAAATTCAAGTCAAATTAGGCATATTTTTCTTGAGTAAAAGAAATTACTAAAAAAGAAGAATATTCTTTTTTTAGTAATTTCTTTTACTCAAATTTTCCATTTATCTCACTTATCTTATCTATTCT…
	Barleria_cristata__Cultivated_form_3___SSP_060_ TTAATTAATTGGTTCGGATTCGCCGGATCTTTCCTCTTTTGAAAAGACTCAACAAAAGGGTAAAGATATACATAAAGTTAACCGAACTTAACTAGAATTTTTGGATTGGAATTTCTTTTTATTCTTATTCATTCTTAGTTTCTGCTAAATACTTCAAATATTCAAACCAAGAAGTTCCAGTTGGTCAAATGAAAGAGATTGGATTACCAGTCCACTTCAAATTTTGAAATTCAAGTCAAATTAGGCATATTTTTCTTGAGTAAAAGAAATTACTAAAAAAGAAGAATATTCTTTTTTTAGTAATTTCTTTTACTCAAATTTTCCATTTATCTCACTTATCTTATCTATTCT…
	Barleria_cristata__Cultivated_form_3___SSP_070_ TTAATTAATTGGTTCGGATTCGCCGGATCTTTCCTCTTTTGAAAAGACTCAACAAAAGGGTAAAGATATACATAAAGTTAACCGAACTTAACTAGAATTTTTGGATTGGAATTTCTTTTTATTCTTATTCATTCTTAGTTTCTGCTAAATACTTCAAATATTCAAACCAAGAAGTTCCAGTTGGTCAAATGAAAGAGATTGGATTACCAGTCCACTTCAAATTTTGAAATTCAAGTCAAATTAGGCATATTTTTCTTGAGTAAAAGAAATTACTAAAAAAGAAGAATATTCTTTTTTTAGTAATTTCTTTTACTCAAATTTTCCATTTATCTCACTTATCTTATCTATTCT…
	Barleria_cristata__Cultivated_form_3___SSP_133_ TTAATTAATTGGTTCGGATTCGCCGGATCTTTCCTCTTTTGAAAAGACTCAACAAAAGGGTAAAGATATACATAAAGTTAACCGAACTTAACTAGAATTTTTGGATTGGAATTTCTTTTTATTCTTATTCATTCTTAGTTTCTGCTAAATACTTCAAATATTCAAACCAAGAAGTTCCAGTTGGTCAAATGAAAGAGATTGGATTACCAGTCCACTTCAAATTTTGAAATTCAAGTCAAATTAGGCATATTTTTCTTGAGTAAAAGAAATTACTAAAAAAGAAGAATATTCTTTTTTTAGTAATTTCTTTTACTCAAATTTTCCATTTATCTCACTTATCTTATCTATTCT…
	Barleria_cristata__Hu_S_Y__But_P__23180_ TTAATTAATTGGTTCGGATTCGCCGGATCTTTCCTCTTTTGAAAAGACTCAACAAAAGGGTAAAGATATACATAAAGTTAACCGAACTTAACTAGAATTTTTGGATTGGAATTTCTTTTTATTCTTATTCATTCTTAGTTTCTGCTAAATACTTCAAATATTCAAACCAAGAAGTTCCAGTTGGTCAAATGAAAGAGATTGGATTACCAGTCCACTTCAAATTTTGAAATTCAAGTCAAATTAGGCATATTTTTCTTGAGTAAAAGAAATTACTAAAAAAGAAGAATATTCTTTTTTTAGTAATTTCTTTTACTCAAATTTTCCATTTATCTCACTTATCTTATCTATTCTTTTTCTT…
	Barleria_cristata__Nandi_hills___SSP_004_ TTAATTAATTGGTTCGGATTCGCCGGATCTTTCCTCTTTTGAAAAGACTCAACAAAAGGGTAAAGATATACATAAAGTTAACCGAACTTAACTAGAATTTTTGGATTGGAATTTCTTTTTATTCTTATTCATTCTTAGTTTCTGCTAAATACTTCAAATATTCAAACCAAGAAGTTCCAGTTGGTCAAATGAAAGAGATTGGATTACCAGTCCACTTCAAATTTTGAAATTCAAGTCAAATTAGGCATATTTTTCTTGAGTAAAAGAAATTACTAAAAAAGAAGAATATTCTTTTTTTAGTAATTTCTTTTACTCAAATTTTCCATTTATCTCACTTATCTTATCTATTCTTTTTCT…
	Barleria_cristata__Nandi_hills___SSP_051_ TTAATTAATTGGTTCGGATTCGCCGGATCTTTCCTCTTTTGAAAAGACTCAACAAAAGGGTAAAGATATACATAAAGTTAACCGAACTTAACTAGAATTTTTGGATTGGAATTTCTTTTTATTCTTATTCATTCTTAGTTTCTGCTAAATACTTCAAATATTCAAACCAAGAAGTTCCAGTTGGTCAAATGAAAGAGATTGGATTACCAGTCCACTTCAAATTTTGAAATTCAAGTCAAATTAGGCATATTTTTCTTGAGTAAAAGAAATTACTAAAAAAGAAGAATATTCTTTTTTTAGTAATTTCTTTTACTCAAATTTTCCATTTATCTCACTTATCTTATCTATTCTTTTTCT…
	Barleria_cristata__Nandi_hills___SSP_069_ TTAATTAATTGGTTCGGATTCGCCGGATCTTTCCTCTTTTGAAAAGACTCAACAAAAGGGTAAAGATATACATAAAGTTAACCGAACTTAACTAGAATTTTTGGATTGGAATTTCTTTTTATTCTTATTCATTCTTAGTTTCTGCTAAATACTTCAAATATTCAAACCAAGAAGTTCCAGTTGGTCAAATGAAAGAGATTGGATTACCAGTCCACTTCAAATTTTGAAATTCAAGTCAAATTAGGCATATTTTTCTTGAGTAAAAGAAATTACTAAAAAAGAAGAATATTCTTTTTTTAGTAATTTCTTTTACTCAAATTTTCCATTTATCTCACTTATCTTATCTATTCTTTTTCT…
	Barleria_cristata__Nandi_hills___SSP_131_ TTAATTAATTGGTTCGGATTCGCCGGATCTTTCCTCTTTTGAAAAGACTCAACAAAAGGGTAAAGATATACATAAAGTTAACCGAACTTAACTAGAATTTTTGGATTGGAATTTCTTTTTATTCTTATTCATTCTTAGTTTCTGCTAAATACTTCAAATATTCAAACCAAGAAGTTCCAGTTGGTCAAATGAAAGAGATTGGATTACCAGTCCACTTCAAATTTTGAAATTCAAGTCAAATTAGGCATATTTTTCTTGAGTAAAAGAAATTACTAAAAAAGAAGAATATTCTTTTTTTAGTAATTTCTTTTACTCAAATTTTCCATTTATCTCACTTATCTTATCTATTCTTTTTCT…
	Barleria_cristata__Uttarakhand___SSP_023_ TTAATTAATTGGTTCGGATTCGCCGGATCTTTCCTCTTTTGAAAAGACTCAACAAAAGGGTAAAGATATACATAAAGTTAACCGAACTTAACTAGAATTTTTGGATTGGAATTTCTTTTTATTCTTATTCATTCTTAGTTTCTGCTAAATACTTCAAATATTCAAACCAAGAAGTTCCAGTTGGTCAAATGAAAGAGATTGGATTACCAGTCCACTTCAAATTTTGAAATTCAAGTCAAATTAGGCATATTTTTCTTGAGTAAAAGAAATTACTAAAAAAGAAGAATATTC-TTTTTTAGTAATTTCTTTTACTCAAATTTTCCATTTATCTCACTTATCTTATCTATTCTTTTTCT…
	Barleria_cristata__Uttarakhand___SSP_055_ TTAATTAATTGGTTCGGATTCGCCGGATCTTTCCTCTTTTGAAAAGACTCAACAAAAGGGTAAAGATATACATAAAGTTAACCGAACTTAACTAGAATTTTTGGATTGGAATTTCTTTTTATTCTTATTCATTCTTAGTTTCTGCTAAATACTTCAAATATTCAAACCAAGAAGTTCCAGTTGGTCAAATGAAAGAGATTGGATTACCAGTCCACTTCAAATTTTGAAATTCAAGTCAAATTAGGCATATTTTTCTTGAGTAAAAGAAATTACTAAAAAAGAAGAATATTC-TTTTTTAGTAATTTCTTTTACTCAAATTTTCCATTTATCTCACTTATCTTATCTATTCTTTTTCT…
	Barleria_cristata__Uttarakhand___SSP_065_ TTAATTAATTGGTTCGGATTCGCCGGATCTTTCCTCTTTTGAAAAGACTCAACAAAAGGGTAAAGATATACATAAAGTTAACCGAACTTAACTAGAATTTTTGGATTGGAATTTCTTTTTATTCTTATTCATTCTTAGTTTCTGCTAAATACTTCAAATATTCAAACCAAGAAGTTCCAGTTGGTCAAATGAAAGAGATTGGATTACCAGTCCACTTCAAATTTTGAAATTCAAGTCAAATTAGGCATATTTTTCTTGAGTAAAAGAAATTACTAAAAAAGAAGAATATTC-TTTTTTAGTAATTTCTTTTACTCAAATTTTCCATTTATCTCACTTATCTTATCTATTCTTTTTCT…
	Barleria_cristata__Uttarakhand___SSP_134_ TTAATTAATTGGTTCGGATTCGCCGGATCTTTCCTCTTTTGAAAAGACTCAACAAAAGGGTAAAGATATACATAAAGTTAACCGAACTTAACTAGAATTTTTGGATTGGAATTTCTTTTTATTCTTATTCATTCTTAGTTTCTGCTAAATACTTCAAATATTCAAACCAAGAAGTTCCAGTTGGTCAAATGAAAGAGATTGGATTACCAGTCCACTTCAAATTTTGAAATTCAAGTCAAATTAGGCATATTTTTCTTGAGTAAAAGAAATTACTAAAAAAGAAGAATATTC-TTTTTTAGTAATTTCTTTTACTCAAATTTTCCATTTATCTCACTTATCTTATCTATTCTTTTTCT…
	Barleria_dulcis TTAATTAATTGGTTCGGATTCGCCGGATCTTTCCTCTTTTGAAAAGACTCAACAAAAGGGTAAAGATATGCACTAACGAAACCGAACTTAACTAGAATTTTTGGATTGGAATTTCTTTTTATTCTTATTCATTCTTAGTTTCTGCTAAATACTTCAAATATTCAAACCAAGAAGTTCCAGTTGGTCAAATGAAAGAGATTGGATTACCAGTCCACTTCAAATTTTGAAATTCAAGTCAAATTAGGCATATTTTTCTTGAGTAAAAGAAATTACTAAAAAAGAAGAATATTCTTCTTTTAGTAATTTCTTTTACTCTAATTTTCCATTTATCTCACTTATCTTATCTATTCTTTTTCTTTTCGATTTGTAGAAAAAATATTATC…
	Barleria_grandiflora TTAATTAATTGTTTCCGATTCGCCGGATCTTACCT?????GAAAGGACTCAACAAAAGGGTAAAGATATGCACTAAGTTAACCGAACTTAACTAGAATTTTTGGATTTGAATTTCTTTTTATACTTATTCATTCTTAGTTTCTGCTAAATACTTCAAATATTCAAACCAAGAAGTTCCAGTTGGTCAACTGAAAGAGATTGGATTACGAGTCCACTTCAAATTTTGAAATTCAAGTAAAATTAGGCATATTTTTCTTGAGTTTAACAAATTACTAAAAAAGAAGAATATTCTTCTTTTAGTAATTTCTTTTACTGTAATTTTCCGTTTATCTCACTTATCTTATCTATTCTTTTTCTTTTCGATTTGTAGAAAAAATA…
	Barleria_grandipetala TTAATTAATTGTTTCCGATTCGCCGGATCTTACCTCTTTTGA???TACTCAACAAAAGGGTAAAGATATGCACTAAGTTAACCGAACTTAACTAGAATTTTTGGATTTGAATTTCTTTTTATACTTATTCATTCTTAGTTTCTGCTAAATACTTCAAATATTCAAACCAAGAAGTTCCAGTTGGTCAACTGAAAGAGATTGGATTACCAGTCCACTTCAAATTTTGAAATTCAAGTCAAATTAGGCATATTTTTCTTGAGTTTAACAAATTACTAAAAAAGAAGAATATTCTTCTTTTAGTAATTTCTTTTACTGTAATTTTCCGTTTATCTCACTTATCTTTTCTATTCTTTTTCTTTTCGATTTGTAGA-AAAAT…
	Barleria_grandis TTAATTAATTGTTTCCGATTCACCGGATCTTACCTCTTTTGAAAGGACTCAACAAAAGGGTAAAGATATGCACTAAGTTAACCGAACTTAACTAGAATTTTTGGATTTGAATTTCTTTTTATACTTATTCATTCTTARTTTCGGCTAAATCCTTCAAATATTCAAACCAAGAAGTTCCAGTTGGTCAACTGAAAGAGATTGGATTACCAGTCCACTTCAAATTTTGAAATTCAAGTCAAATTAGGCATATTTTTCTTGAGTTTAACAAATTACTAAAAAAGAAGAATATTCTTCTTTTAGTAATTTCTTTTACTGTAATTTTCCGTTTATCTCACTTATCTTTTCTATTCTTTTTCTTTTCGATTTGTAGA-AAAATATTAT…
	Barleria_grootbergensis ???????????????????????????????????????????????????????????????????????????????????????????????????????????????????????????????????????????????????????????????????????????????????????????????????????????????????????????????????????????????????????????????????????????????????????????????????????????????????????????????????????????????????????????????????????????????????????…
	Barleria_heterotricha TTAATTAATTGGTTCGGATTCGCCGGATCTTTCCTCTTTTGAAAAGACTCAACAAAAGGGTAAAGATATGCATAAAGTTAACCGAACTTAACTAGAATTTTTGGATTGGAATTTCTTTTTATTCTTATTCATTCTTAGTTTCTGCTAAATACTTCAAATATTCAAACCAAGAAGTTCCAGTTGGTCAAATGAAAGAGATTGGATTACCAGTCCACTTCAAATTTTGAAATTCAAGTCAAATTAGGCATATTTTTCTTGAGTAAAAGAAATTACTAAAAAAGAAGAATATTCTTCTTTTAGTAATTTCTTTTACTCTAATTTTCCATTTATCTCACTTATCTTATCTATTCTTTTTCTTTTCGATTTGTAGAAAAAAT…
	Barleria_hildebrandtii TTAATTAATTGTTTCCGATTCGCCGGATCTTACCT?T??TGAAAGGACTCAACAAAAGGGTAAAGATATGCACTAAGTTAACCGAACTTAACTAGAATTTTTGGATTTGAATTTCTTTTTATACTTATTCATTCTTAGTTTCTGATAAATACTTCAAATATTCAAACCAAGAAGTTCCAGTTGGTCAACTGAAAGAGCTTGGATTACCAGTCCACTTCAAATTTTCAAATTCAAGTAAAATTAGGCATATTTTTCTTGAGTTTAAGAAATTACTAAAAAAGAAGAATATTCTTCTTTTAGTAATTTCTTTTACTGTAATTTTCCATTTATCTCATTTATCTTATCTATTCTTTTTCTTTTCGATTTGTAGAAAAAA…
	Barleria_involucrata TTAATTAATTGGTTCGGATTCGCCGGATCTTTCCTCTTTTGAAAAGACTCAACAAAAGGGTAAAGATATGCACAAAGTTAACCGAACTTAACTAGAATTTTTGGATTGGAATTTCTTTTTATTCTTATTCATTCTTAGTTTCTGCTAAATACTTCAAATATTCAAACCAGGAAGTTCCAGTTGGTCAAATGAAAGAGATTGGATTACCAGTCCACTTCAAATTTTGAAATTCAAGTTAAATTAGGCATATTTTTCTTGAGTAAAAGAAATTACTAAAAAAGAAGAATATTCTTCTTTTAGTAATTTCTTTTACTCAAATTTTGCATTTATCTCA-----CTTATCTATTCTTTTTCTTTTCGATTTGTAGAAAAAATA…
	Barleria_kaloxytona TTAATTAATTGTTTCCGATTCGCCGGATCTTACCTCTTTTGAAAGGACTCAACAAAAGGGTAAAGATATGCACTAAGTTAACCGAACTTAACTAGAATTTTTGGATTTGAATTTTT--------TTATTCATTCTTAGTTTCGGCTAAATACTTCAAATATTCAAACCAAGAAGTTCTAGTTGGTCAACTGAAAGAGATTGGATTACCAGTCCACTTCAAATTTTCAAATTCAAGTAAAATTAGGCATATTTTTCTTGAGTTTAAGAAATTACTAAAAAAGAAGAATATTCTTCTTTTAGTAATTTCTTTTACTGTAATTTTCCATTTATCTCATTTATCTTATCTATTCTTTTTCTTTTCGATTTGTAGAAAAAATAT…
	Barleria_kitchingii TTAATTAATTGGTTCGGATTCGCCGGATCTTTCCTCTTTTGAAAAGACTCAACAAAAGGGTAAAGATATGCACTAAGTTAACCGAACTTAACTAGAATTTTTGGATTGGAATTTCTTTTTATTCTTATTCATTCTTAGTTTCTGCTAAATACTTCAAATATTCAAACCAAGAAGTTCCAGTTGGTCAAATGAAAGAGATTGGATTCCCAGTCCACTTCAAATTTTGAAATTCAAGTCAAATTAGGCATATTTTTCTTGAGTAAAAGAAATTACTAAAAAAGAAGAATATTCTTCTTTTAGTAATTTCTTTTACTCAAATTTTCCATTTATCTCACTTATCTTATCTATTCTTTTTCTTTTCGATTTGTAGAAAAAATAT…
	Barleria_lancifolia -------------------------------------------------------------------------------------------------------------------------------------------------------------------------------------------------------------------------------------------------------------------------------------------------------------------------------------------------------------------------------------------…
	Barleria_leandrii TTAATTAATTGTTTCCGATTCGCCGGATCTTACT??TTTTGAAAGGACTCAACAAAAGGGTAAAGATATGCACTAAGTTAACCGAACTTAACTAGAATTTTTGGATTTGAATTTTT--------TTATTCATTCTTAGTTTCGGCTAAATACTTCAAATATTCAAACCAAGAAGTTCTAGTTGGTCAACTGAAAGAGATTGGATTACCAGTCCCCTTCAAATTTTCAAATTCAAGTAAAATTAGGCATATTTTTCTTGAGTTTAAGAAATTACTAAAAAAGAAGAATATTCTTCTTTTAGTAATTTCTTTTACTGTAATTTTCCATTTATCTCATTTATCTTATCTATTCTTTTTCTTTTCGATTTGTAGAAAAAATATTA…
	Barleria_limnogeton TTAATTAATTGTTTCCGATTCGCCGGATCTTACCTC???TGAAAGGACTCAACAAAAGGGTAAAGATATGCACTAAGTTAACCGAACTTAACTAGAATTTTTGGATTTGAATTTCTTTTTATACTTATTCATTCTTAGTTTCTGCTAAATACTTCAAATATTCAAACCAAGAAGTTCCAGTTGGTCAACTGAAAGAGATTGGATTACCAGTCCACTTCAAATTTTGAAATTCAAGTCAAATTAGGCATATTTTTCTTGAGTTTAAGAAATTACTAAAAAAGAAGAATATTCTTCTTTTAGTAATTTCTTTTACTATAATTTTCCGTTTATCTCA-----CTTATCTATTCTTTTTCTTTTCGATTTCTAGAAAAAATAT…
	Barleria_lupulina TTAATTAATTCTTTCCGATTCGCCGGATCTTACCTCTTTTGAAAGGACTCAACAAAAGGGTAAAGATATGCACTAAGTTAACCGAACTTAACTAGAACTTTTGGATTTGAATTTTT--------TTATTCATTCTTAGTTTCGGCTAAATACTTCAAATATTCAAACCAAGAAGTTCTAGTTGGTCAACTGAAAGAGATTGGATTACCAGTCCCCTTCAAATTTTCAAATTCAAGTAAAATTAGGCATATTTTTCTTGAGTTTAAGAAATTACTAAAAAAGAAGAATATTCTTCTTTTAGTAATTTCTTTTACTGTAATTTTCCATTTATCTCATTTATCTTATCTATTCTTTTTCTTTTCGATTTGTAGAAAAAATATTA…
	Barleria_lupulina_2_ ??????????????????????????????????????????????????????????????????????????????????????????????????????????????????????????????????????????????????????????????????????????????????????????????????????????????????????????????????????????????????????????????????????????????????????????????????????????????????????????????????????????????????????????????????????????????????????????…
	Barleria_mackenii TTAATTAATTGTTTCCGATTCGCCGGATCTTACCTCTTTTGAAAGGACTCAACAAAAGGGTAAAGATATGCACTAAGTTAACCGAACTTAACTAGAATTTTTGGATTTGAATTTCTTTTTATACTTATTCATTCTTAGTTTCTGCTAAATACTTCAAATATTCAAACCAAGAAGTTCCAGTTGGTCAACTGAAAGAGATTGGATTACCAGTCCACTTCAAATTTTGAAATTCAAGTCAAATTAGGCATATTTTTCTTGAGTTTAACAAATTACTAAAAAAGAAGAATATTCTTCTTTTAGTAATTTCTTTTACTGTAATTTTCCGTTTATCTCACTTATCTTTTCTATTCTTTTTCTTTTCGATTTGTAGA-AAAATATTA…
	Barleria_maclaudii TTAATTAATTGTTTCCGATTCGCCGGATCTTACCTCTTTTGAAAGGACTCAACAAAAGGGTAAAGATATGCACTAAGTTAACCGAACTTAACTCGAATTTTTGGATTTGAATTTCTTTTTATACTTATTCATTCTTAGTTTCTGCTAAATACTTCAAATATTCAAACCAAGAAGTTCCAGTTGGTCAACTGAAAGAGATTGGATTACCAGTCCACTTCAAATTTTGAAATTCAAGTCAAATTAGGCATATTTTTCTTGAGTTTAACAAATTACTAAAAAAGAAGAATATTCTTCTTTTAGTAATTTCTTTTACTGTAATTTTCCGTTTATCTCACTTATCTTTTCTATTCTTTTTCTTTTCGATTTG-------------…
	Barleria_meeuseana TTAATTAATTGGTTCGGATTCGCCAGATCTTTCCTCTTTTGAAAAGACTCAAGAAAAGGGTAAAGATATGCATAAAGTTAACCGAACTTAACTAGAATTTTTGGATTGGAATTTCTTTTTATTCTTATTCATTCTTAGTTTCTGCTAAATACTTCAAATATTCAAACCAAGAAGTTCTAGTTGGTCAAATGAAAGAGATTGGATTACCAGTCCACTTCAAATTTTGAAATTCAAGTCAAATTAGGCATATTTTTCTTGAGTAAAAGAAATTACTAAAAAAGAAGAATATTCTTCTTTTAGTAATTTCTTTTACTCTAATTTTCCATTTATCTCA-----CTTATCTATTCTTTTTCTTTTCGATTTGTAGAAAAAATATT…
	Barleria_meeuseana_2_ TTAATTAATTGGTTCGGATTCGCCGGATCTTTCCTCTTTTGAAAAGACTCAACAAAAGGGTAAAGATATGCATAAAGTTAACCGAACTTAACTAGAATTTTTGGATTGGAATTTCTTTTTATTCTTATTCATTCTTAGTTTCTGCTAAATACTTCAAATATTCAAACCAAGAAGTTCCGGTTGGTCAAATGAAAGAGATTGGATTACCAGTCCACTTCAAATTTTGAAATTCAAGTCAAATTAGGCATATTTTTCTTGAGTAAAAGAAATTACTAAAAAAGAAGAATATTCTTCTTTTAGTAATTTCTTTTACTCTAATTTTCCATTTATCTCACTTATCTTATCTATTCTTTTTCTTTTCGATTTGTAGAAAAAAT…
	Barleria_merxmuelleri TTAATTAATTGGTTCGGATTCGCCGGATCTTTCCTCTTTTGAAAAGACTCAACAAAAGGGTAAAGATATGCATAAAGTTAACCGAACTTAACTAGAATTTTTGGATTGGAATTTCTTTTTATTCTTATTCATTCTTAGTTTCTGCTAAATACTTCAAATATTCAAACCAAGAAGTTCCAGTTGGTCAAATGAAAGAGATTGGATTACCAGTCCACTTCAAATTTTGAAATTCAAGTCAAATTAGGCATATTTTTCTTGAGTAAAAGAAATTACGAAAAAAGAAGAATATTCTTCTTTTCGTAATTTCTTTTACTCTAATTTTCCATTTATCTCACTTATCTTATCTATTCTTTTTCTTTTCGATTTGTAGAAAAAAT…
	Barleria_meyeriana TTAATTAATTGTTTCCGATTCGCCGGATCTTACCTCTTTTGAAAGGACTCAACAAAAGGGTAAAGATATGCACTAAGTTAACCGAACTTAACTAGAATTTTTGGATTTGAATTTCTTTTTATACTTATTCATTCTTAGTTTCTGCTAAATACTTCAAATATTCAAACCAAGAAGTTCCAGTTGGTCAACTGAAAGAGATTGGATTACCAGTCCACTTCAAATTTTGAAATTCAAGTCAAATTAGGCATATTTTTCTTGAGTTTAAGAAATTACTAAAAAAGAAGAATATTCTTCTTTTAGTAATTTCTTTTACTATAATTTTCCGTTTATCTCA-----CTTATCTATTCTTTTTCTTTTCGATTTGTAGAAAAAATATT…
	Barleria_monticola TTAATTAATTGTTTCCGATTCGCCGGATCTTACCTCTTTTGAAAGGATTCAACAAAAGGGTAAAGATATGCACTAAATTAACCGAACTTAACTAGAATTTGTGGATTTGAATTTCTTTTTATTCTTATTCATTCTTAGTTTCTGCTAAATACTTCAAATATTCAAACCAAGAAGTTCCAGTTGGTCAAATGAAAAAGATTGGATTACCAGTCCACTTCAAATTTTGAAATTCAAGTCAAATTAGGCATATTTTTATTGAGTTTAAGAAATTACTAAAAAAGAAGAATATTCTTCTTTTAGTAATTTCTTTTACTCTAATTTTCCATTTATCTCACTTATCTTATCTATTCTTTTTCTTTTCGATTTGTAGAAAAAATATT…
	Barleria_mutabilis TTAATTAATTGGTTCGGATTCGCCGGATC????CTCTTTTGAAAAGACTCAACAAAAGGGTAAAGATATGCACTAAGTTAACCGAATTTAACTAGAATTTTTGGATTGGAATTTCTTTTTATTCTTATTCATTCTTAGTTTCTGCTAAATACTTCAAATATTCAAACCAAGAAGTTCCAGTTGGTCAAATGAAAGAGATTGGATTACCAGTCCACTTCAAATTTTGAAATTCAAGTCAAATTAGGCATATTTTTCTTGAGTAAAAGAAATTACTAAAAAAGAAGAATATTCTTCTTTTAGTAATTTCTTTTACTCTAATTTTCCATTTATCTCACTTATCTCATCTATTCTTTTTCTTTTCGATTTGTAGAAAAAATATT…
	Barleria_nitida TTAATTAATTGGTTCGGATTCGCCGGATCTTTCCTCTTTTGAAAAGACTCAACAAAAGAGGAAAGATATGCATAAAGTTAACCGAACTTAACTAGAATTTTTGGATTGGAATTTCTTTTTATTCTTATTCATTCTTAGTTTCTGCTAAATACTTCAAATATTCAAACCAAGAAGTTCCAGTTGGTCAAATGAAAGAGATTGGATTACCAGTCCACTTCAAATTTTGAAATTCAAGTCAAATTAGGCATATTTTTCTTGAGTAAAAGAAATTACTAAAAAAGAAGAATATTCTTCTTTTAGTAATTTCTTTTACTCTAATTTTCCATTTATCTCACTTATCTTATCTATTCTTTTTCTTTTCGATTTGTAGAAAAA--------…
	Barleria_obtusa TTAATTAATTGGTTCGGATTCGCCGGATCTTTCCTCTTTTGAAAAGACTCAACAAAAGGGTAAAGATATGCATAAAGTTAACCGAACTTAACTAGAATTTTTGGATTGGAATTTCTTTTTATTCTTATTCATTCTTAGTTTCTGCTAAATACTTCAAATATTCAAACCAAGAAGTTCCAGTTGGTCAAATGAAAGAGATTGGATTACCAGTCCACTTCAAATTTTGAAATTCAAGTCAAATTAGGCATATTTTTCTTGAGTAAAAGAAATTACTAAAAAAGAAGAATATTCTTCTTTTAGTAATTTCTTTTACTCTAATTTTCCATTTATCTCACTTATCTTATCTATTCTTTTTCTTTTCGATTTGTAGAAAAAATATTATC…
	Barleria_oenotheroides TTAATTAATTGGTTCGGATTCGCCGGATCTTCCCTCTTTTGAAAAGACTCAACAAAAGGGTAAAGATATGCACTAAGTTAACCGAACTTAACTAGAATTTTTGGATTGGAATTTCTTTTTATTCTTATTCATTCTTAGTTTCTGCTAAATACTTCAAATATTCAAACCAAGAAGTTCCAGTTGGTCAAATGAAAGAGATTGGATTACCAGTCCACTTCAAATTTTGAAATTCAAGTCAAATTAGGCATATTTTTCTTGAGTTTAAGAAATTACTAAAAAAGAAGAATATTCTTCGTTTAGTAATTTCTTTTACTCGAATTTTCCATTTATCTCA-----CTTATCTATTCTTTTTCTTTTCGATTTGTAGAAAAAA…
	Barleria_oenotheroides_2_ TTAATTAATTGGTTCGGATTCGCCGGATCTTCCCTCTTTTGAAAAGACTCAACAAAAGGGTAAAGATATGCACTAAGTTAACCGAACTTAACTAGAATTTTTGGATTGGAATTTCTTTTTATTCTTATTCATTCTTAGTTTCTGCTAAATACTTCAAATATTCAAACCAAGAAGTTCCAGTTGGTCAAATGAAAGAGATTGGATTACCAGTCCACTTCAAATTTTGAAATTCAAGTCAAATTAGGCATATTTTTCTTGAGTTTAAGAAATTACTAAAAAAGAAGAATATTCTTCGTTTAGTAATTTCTTTTACTCGAATTTTCCATTTATCTCA-----CTTATCTATTCTTTTTCTTTTCGATTTGTAGAAA…
	Barleria_ovata TTAATTAATTGGTTCGGATTCGCCAGATCTTTCCTCTTTTGAAAAGATTCAACAAAAGGGTAAAGATATGCATAAAGTTAACCGAACTTAACTAGAATTTTTGGATTGGAATTTCTTTTTATTCTTATTCATTCTTAGTTTCTGCTAAATACTTCAAATATTCAAACCAAGAAGTTCCAGTTGGTCAAATGAAAGAGATTGGATTACCAGTCCACTTCAAATTTTGAAATTCAAGTCAAATTAGGCATATTTTTCTTGAGTAAAAGAAATTACTAAAAAAGAAGAATATTCTTCTTTTAGTAATTTCTTTTACTCTAATTTTCCATTTATCTCACTTATCTTATCTATTCTTTTTCTTTTCGATTTGTAGAAAAAATATTATCT…
	Barleria_parvispina TTAATTAATTGTTTCCGATTCGCCGGATCTTACCTCTTTTGAAAGGACTCAACAAAAGGGTAAAGATATGCACTAAGTTAACCGAACTTAACTAGAATTTTTGGATTTGAATTTTT--------TTATTCATTCTTAGTTTCGGCTAAATACTTCAAATATTCAAACCAAGAAGTTCTAGTTGGTCAACTGAAAGAGATTGGATTACCAGTCCCCTTCAAATTTTCAAATTCAAGTAAAATTAGGCATATTTTTCTTGAGTTTAAGAAATTACTAAAAAAGAAGAATATTCTTCTTTTAGTAATTTCTTTTACTGTAATTTTCCATTTATCTCATTTATCTTATCTATTCTTTTTCTTTTCGATTTGTAGAAAAAATAT…
	Barleria_popovii TTAATTAATTGTTTCCGATTCGCCGGATCTTACCYCTTTTGAAAGGACTCAACAAAAGGGTAAAGATATGCACTAAGTTAACCGAACTTAACTAGAATTTTTGGATTTGAATTTCTTTTTATACTTATTCATTCTTAGTTTCTGCTAAATACTTCAAATATTCAAACCAAGAAGTTCCAGTTGGTCAACTGAAAGAGATTGGATTACCAGTCCACTTCAAATTTTGAAATTCAAGTCAAATTAGGCATATTTTTCTTGAGTTTAACAAATTACTAAAAAAGAAGAATATTCTTCTTTTAGTAATTTCTTTTACTGTAATTTTCCGTTTATCTCACTTATCTTATCTATTCTTTTTCTTTTCGATTTGTAGAAAAAATATTAT…
	Barleria_prionitis --------------------------------------------------------------------------------------------------------------------------------------------------------------------------------------------------------------------------------------------------------------------------------------------------------------------------------------------------------------------------------------------…
	Barleria_pseudosomalia TTAATTAATAGGTTCGGATTTGCCAGATCTTTCCTCTTTTGAAAAGACTCAACAAAAGGGTAAAGATATGCACTAAGTTAACCGAACTTAACTAGAATTTTTGGATTGGAATTTCTTTTTATTCTTATTCATTCTTAGTTTCTGCTAAATACTTTAAATATTCAAACCAAGAAGTTCCAGTTGGTCAAATGAAAGAGATTGGATTACCAGTCCACTTCAAATTTTGAAATTCAAGTCAAATTAGACATATTTTTCTTGAGTAAAAGAAATTACTAAAAAAGAAGAATATTCTTCTTTTAGTAATTTCTTTTACTCAAATTTTCCATTTATCTCACTTATCTTATCTATTCTTTTTCTTTTCGATTTGTAGAAAAAA…
	Barleria_puberula TTAATTAATTCTTTCCGATTCGCCGGATCTTACCTCTTTTGAAAGGACTCAACAAAAGGGTAAAGATATGCACTAAGTTAACCGAACTTAACTGGAACTTTTGGATTTGAATTTCTTTTTATACTTATTCATTCTTAGTTTCTGCTAAATACTTCAAATATTCAAACCAAGAAGTTCCAGTTGGTCAACTGAAAGAGATTGGATTACCAGTCCACTTCAAATTTTGAAATTCAAGTCAAATTAGGCATATTTTTCTTGAGTTTAAGAAATTACTAAAAAAGAAGAATATTCTTCTTTTAGTAATTTCTTTTACTATAATTTTCCGTTTATCTCACTTATCTTATCTATTCTCTTTCTTTTCAATTTGTAGAAAAAATATTA…
	Barleria_quadrispina TTAATTAATTGTTTCCGATTCGCCGGATCTTACCTCT??TGAAAGGATTCAACAAAAGGGTAAAGATATGCACTAAGTTAACCGAACTTAACTAGAATTTTTGGATTTGAATTTTT--------TTATTCATTCTTAGTTTCGGCTAAATACTTCAAATATTCAAACCAAGAAGTTCTAGTTGGTCAACTGAAAGAGATTGGATTACCAGTCCACTTCAAATTTTCAAATTCAAGTAAAATTAGGCATATTTTTCTTGAGTTTAAGAAATTACTAAAAAAGAAGAATATTCTTCTTTTAGTAATTTCTTTTACTGTAATTTTCCATTTATCTCATTTATCTTATCTATTCTTTTTCTTTTCGATTTGTAGAAAAAATA…
	Barleria_richardsiae TTAATTAATTGTTTCCGATTCGCCGGATCTTACCTCTTTTGAAAGGACTCAACAAAAGGGTAAAGATATGCACTAAGTTAACCGAACTTAACTAGAATTTTTGGATTTGAATTTCTTTTTATACTTATTCATTCTTAGTTTCTGCTAAATACTTCAAATATTCAAACCAAGAAGTTCCAGTTGGTCAACTGAAAGAGATTGGATTACCAGTCCACTTCAAATTTTGAAATTCAAGTCAAATTAGGCATATTTTTCTTGAGTTTAACAAATTACTAAAAAAGAAGAATATTCTTCTTTTAGTAATTTCTTTTACTGTAATTTTCCGTTTATCTCACTTATCTTTTCTATTCTTTTTCTTTTCGATTTGTAGA-AAAATA…
	Barleria_saxatilis TTAATTAATTGGTTCGGATTCGCCGGATCTTTCCTCTTTTGAAAAGACTCAACAAAAGGGTAAAGATATGCATAAAGTTAACCGAACTTAACTAGAATTTTTGGATTGGAATTTCTTTTTATTCTTATTCATTCTTAGTTTCTGCTAAATACTTCAAATATTCAAACCAAGAAGTTCCAGTTGGTCAAATGAAAGAGATTGGATTACCAGTCCACTTCAAATTTTGAAATTCAAGTCAAATTAGGCATATTTTTCTTGAGTAAAAGAAATTACTAAAAAAGAAGAATATTCTTCTTTTAGTAATTTCTTTTACTCTAATTTTCCATTTATCTCACTTATCTTATCTATTCTTTTTCTTTTCGATTTGTAGAAAAAATATT…
	Barleria_splendens TTAATTAATTGTTT?CGATT?GCC?GATTTTACCTTTTTTGAAAGGACTCAACAAAAGGGGAAAGATATGCACTAAGTTAACCGAACTTAACTAGAATTTTTGGATTTGAATTTTTTTTTTTACTTATTCATTCTTAGTTTTTGCTAAATACTTCAAATATTCAAACCAAGAAGTTCCAGTTGGTCAACTGAAAGAGATTGGATTACCAGTCCACTTCAAATTTGCAAATTCAAGAAAAATTAGGCATATTTTTCTTGAGTTTAAGAAATTACTAAAAAAGAAGAATATTCTTTTTTTAGTAATTTCTTTTACTGTAATTTTCCATTTATCTCATTTATCTTATCTATTCTTTTTCTTTTCGATTTGTAGAAAAAATATT…
	Barleria_strigosa TTAATTAATTGGTTCGGATTCGACGGATCTTTCCTCTTTTGAAAAGACTCAACAAAAGGGTAAAGATATGCACAAAGTTAACCGAACTTAACTATAATTTTTGGATTGGAATTTCTTTTTATTCTTATTCATTCTTAGTTTCTGCTAAATACTTCAAATATTCAAACCAAGAAGTTCCAGTTGGTCAAATGAAAGAGATTGGATTACCAGTCCACTTCAAATTTTGAAATTCAAGTCAAATTAGGCATATTTTTCTTGAGTAAAAGAAATTACTAAAAAAGAAGAATATTCTTCTTTTAGTAATTTCTTTTACTCAAATTTTTCATTTATCTCACTTATCTTATCTATTCTTTTTCTTTTCGATTTGTAGA-AAAATATTA…
	Barleria_subregularis TTAATTAATTGTTTCCGATTCGCCAGATCTTACCTCTTTTGAAAGGACTCAACAAAAGGGTAAAGATATGCACTAAGTTAACCGAACTTAACTAGAATTTTTGGATTTGAATTTTT--------TTATTCATTCTTAGTTTCGGCTAAATACTTCAAATATTCAAACCAAGAAGTTCTAGTTGGTCAACTGAAAGAGATTGGGTTACCAGTCCACTTCAAATTTTCAAATTCAAGTAAAATTAGGCATATTTTTCTTGAGTTTAAGAAATTACTAAAAAAGAAGAATATTCTTCTTTTAGTAATTTCTTTTACTGTAATTTTCCATTTATCTCATTTATCTTATCTATTCTTTTTCTTTTCGATTTGTAGAAAAAAT…
	Barleria_taitensis TTAATTAATTGTTTCCGATTCGCCGGATCTTACCTCTTTTGAAAGGACTCAACAAAAGGGTAAAGATATGCACTAAGTTAACCGAACTTAACTAGAATTTTTGGATTTGAATTTCTTTTTATACTTATTCATTCTTAGTTTCTGCTAAATACTTCAAATATTCAAACCAAGAAGTTCCAGTTGGTCAACTGAAAGAGATTGGATTACCAGTCCACTTCAAATTTTCAAATTCAAGTAAAATTAGGCATATTTTTCTTGAGTTTAAGAAATTACTAAAAAAGAAGAATATTCTTCTTTTAGTAATTTCTTTTACTGTAATTTTCCATTTATCTCATTTATCTTATCTATTCTTTTTCTTTTCGATTTGTAGAAAAAATATT…
	Barleria_trispinosa TTAATTAATTGTTTCCGATTCGCCGGATCTTACCTCTTTTGAAAGGACTCAACAAAAGGCTAAAGATATGCACTAAGTTAACCGAACTTAACTAGAATTTTTGGATTTGAATTTTT--------TTATTCATTCTTAGTTTCGGCTAAATACTTCAAATATTCAAACCAAGAAGTTCTAGTTGGTCAACTGAAAGAGATTGGATTACCAGTCCACTTCAAATTTTCAAATTCAAGTAAAATTAGGCATATTTTTCTTGAGTTTAAGAAATTACTAAAAAAGAAGAATATTATTCTTTTAGTAATTTCTTTTACTGTAATTTTCCATTTATCTCATTTATCTTATCTATTCTTTTTCTTTTCGATTTGTAGAAAAAATAT…
	Barleria_ventricosa TTAATTAATTGGTTCGGATTTGCCAGATCTTTCCTCTTTTGAAAAGACTCAACAAAAGGGTAAAGATATGCACTAAGTTAACCGAACTTAACTAGAATTTTTGGATTGGAATTTCTTTTTATTCTTATTCATTCTTAGTTTCTGCTAAATACTTCAAATATTCAAACCAAGAAGTTCCAGTTGGTCAAATGAAAGAGATTGGATTACCAGTCCACTTCAAATTTTGAAATTCAAGTCAAATTAGGCATATT----------------------------------------------------TTTCTTTTACTCAAATTTTCCATTTATCTCACTTATCTTATCTATTCTTTTTCTTTTCGATTTGTAGAAAAAATAT…
	Barleria_whytei TTAATTAATTGGTTCGGATTCGCCGGATCTTTCTCC??TTGAAAAGACTGAACAAAAGGGTAAAGATATGCACTAAGTTAACCGAACTTAACTAGAATTTTTGGATTGGAATTTCTTTTTATTCTTATTCATTCTTAGTTTCTGCTAAATACTTCAAATATTCAAACCAAGAAGTTCCAGTTGGTCAAATGAAAGAGATTGGATTACCAGTCCACTTCAAATTTTGAAATTCAAGTCAAATTAGGCATATT----------------------------------------------------TTTCTTTTACTCTAATTTTCCATTTATCTCA-----CTTATCTATTCTTTTTCTTTTCGATTTCTAGA-AAAATATTATC…
	Barleria_wilmsiana TTAATTAATTGTTTCCGATTCGCCGGATCTTACCTCTTTTGAAAGGACTCAACAAAAGGGTAAAGATATGCACTAAGTTAACCGAACTTAACTAGAATTTTTGGATTTGAATTTCTTTTTATACTTATTCATTCTTAGTTTCTGCTAAATACTTCAAATATTCAAACCAAGAAGTTCCAGTTGGTCAATTGAAAGAGATTGGATTACCAGTCCACTTCAAATTTTGAAATTCAAGTCAAATTAGGCATATTTTTCTTGAGTTTAAGAAATTACTAAAAAAGAAGAATATTCTTCTTTTAGTAATTTCTTTTACTATAATTTTCCGTTTATCTCA-----CTTATCTATTCTTTTTCTTTTCGATTTGTAGAAAAAATATT…
	Crabbea_acaulis TTAATTAATTGTTTCCGATTCGACGGACCTTACCTCTTTTGAAAGGACTCAATAAAAGGGTAAAGATATGCACTAAGTTAACCTAATTTAAATAGAATTTTTGGATTTTAATTTATTTTTATACTTTTTCATTCTGAGTTTCTGCTAAATACTTCAAATATTCAAACCAAGAAGTTCCAATTGGTCAAATGAAAGAGATTG-ATTACCAGTCCACTTCAAAATTGAAAATTCAAGTTAAATTAGGCATATTTTTCTTGAGTTTAACAGATTACTAAAAACGAAAAATATTCTTCGTTTAGTAAAT-----TACTGTAATTTTCCATTTATCTCATTTATTTTATCTATTCTTTTTCT-----ATTTTTAGAAAAAATATTTTC…
	Crabbea_migiurtina TTAAATTAATGTTTCCGATTCGACGGACCTTACCTCTTTTGAAAGGACTCAATAAAAGGCTAAAGATATGCACTAAGTTAACCTAACTTAAATAGAATTTTTGGATTTGAATTTCTTTTTATACTTATTCATTCTGAATTTCTGCTAAATACTTCAAATATTCAAACCAAGAAGTTCCAATTGGTCAAATGAAAGAGATTG------CAGTCCACTTCAAAATTGAAAATTCAAGTTAAATTAGGCATATTTTTCTTGAGTTTAATATATTACTAAAAAAGAAGAATATTCTTCTTTTAGTAAAT-----TACTGTAATTTTCCATTTATTTCATTTATTTTATCTATTCTTTTTCTTTTCGATTTTTAGAAAAAAAAAT…
	Crabbea_thymifolia TTAATTAATTGTTTCCGATTCAACGGACCTTACCTCTTTTGAATGGACTCAATAAAAAGGTAAAGATATGCACTAAGTTAACCTAACTTAAATAGAATTTTTGGATTTGAATTTCTTTTTATACTTATTCATTCTGAATTTCTGCTAAATACTTCAAATATTCAAACCAAGAAGTTCCAATTGGTCAAATGAAAGAGATTG-ATTACCAGTCCACTTCA-------AAATTCAAGTTAAATTAGGCATATTTTTCTTGAGTTTAAGAGATTACTAAAAAAGAAGAATATTCTTCGTTTAGTAAAT-----TACKGTAAATTTCCATTTATCTCATTTATTTTATCTATTCTTTTTCTTTTARATTTTTARAAAAAATATT…
	Lasiocladus_villosus TTAATTAATTGTTTCCGATTCGACGGACCTTACCTCTTTTGAAAGGACTCAATAAAAGGGTAAAGATATGCACTAAGTTAACCTAACTTAAATAGAATTTTTGGATTTTCATTTCTTTTTATACTTATTCATTCTGAGTTTCTGCTAAATACTTCAAATATTGAAACCAAGAAGTTCCAATTGGTCAAATGAAAGAGATTG-ATTACCAGTCCACTTCCAAATTGAAAATGCAAGTTAAATTGGGCATATTTTTCTTGAGTTTAACAGATTACTAAAAAAGAGGAATATTCTTCGTTTAGTAAAT-----TACTGTAATTTTCCATTTTTCTCATTTCTTTTATCTATTCTTTTTCTTTTCGATTTTTAGAAAAAATA…
	Lepidagathis_chiapensis --GATTAATTGTTTCCGATTCGACGGACCTTACCTCTTTTGAAAGGACTCAATAAAAGGGTAAAGATATGCACTAAGTTAACCTAACTTAAATAGGATTTTCGGATTTTAATTTCTTTTTATACTTATTCATTCTGAGTTTCTGCTAAATACTTCAAATATTCAAACCAAGAAGTTCTAATTGGTCAAATGAAAGAGATTG-ATTACCAGTCCACTTCAAATTTGAAAATTCAAGTCAAATTAGGCATATTTTT-----------------------------------------TTGAGTAATTACTTTTACTGTAATTTTCCATTTATCTTACTTATCTTATCCATTCTTTTTCTTTTCGATTTTTCGAAAAA…
	Lepidagathis_scabra --------GTGTTTCCGATTCGACGGACCTTACCTCTTTTGAAAGGACTCAATAAAAGGGTAAAGATATGCACTAAGTTAACCTAACTTAAATAGGATTTTCGGATTTTAATTTCTTTTTATACTTAGTCATTCTGAGTTTCTGCTAAATACTTCAAATATTCAAACCAATAAGTTCCAATTGGTCAAATGAAAGAGATTG-ATTACCAGTCCACTTCAAATTTGAAAATTCAAGTCAAATTAGGCATATTTTT-----------------------------------------TTGAGTAATTTCTTTTATTGTAATTTTCCATTTATCTTACTTATCTTATCCATTCTTTTTCTTTTCGATTTTTCGAAAAAATAT…
	Lepidagathis_sessilifolia ---------TGTTTCCGATTCGACGGACCTTACCTCTTTTGAATGGACTCAATAAAAGGGTAAAGATATGCACTAAGTTAACCTAACTTAAATAGGATTTTCGGATTTGAATTTCTTTTTATACTTATTCATTCTGAGTTTCTGCTAAATACTTCAAATATTCAAACCAAGAAGTTCCAATTGGTCAAATGAAAGAGATTG-ATTACCAGTCCACTTCAAATTTGAAAATTCAAGTCAAATTAGGCATATTTTT-----------------------------------------TTGAGTAATTACTTTTACTGTAATTTTCCATTTATCTTACTTATCTTATCCGTTCTTTTTCTTTTCGATTTTTCGAAA…
	Lepidagathis_uxpanapensis TGAATTAATTGTTTCCGATTCGACGGACCTTACCTCTTTTGAAAGGACTCAATAAAAGGGTAAAGATATGCACTAAGTTAACCTAACTTAAATAGGATTTTCGGATTTTAATTTCTTTTTATACTTATTCATTCTGAGTTTCTGCTAAATACTTCAAATATTCAAACCAAGAAGTTCCAATTGGTCAAATGAAAGAGATTG-ATTACCAGTCCACTTCAAATTTGAAAATTCAAGTCAAATTAGGCATATTTTT-----------------------------------------TTGAGTAATTACTTTTACTGTAATTTTCCATTTATCTTACTTATCTTATCCATTCTTTTTCTTTTCGATTTTTCGAAA…
	Schaueriopsis_variabilis TTAATTAATTGTTTCCGATT----------TACCTCTTTTGAAAGGACTCAATAAAAGGGTAAAGATATGCACTAAGTTAAGCTAACTTAAATAGGATTTTCGGATTTTAATTTCTTTTTATACTTATTCATTCTGAATTTCTGCTAAATACTTCAAATATTCAAACCAAGAAGTTCCAATTGGTCAAATGAAAGAGATTG-ATTACCAGTCCACTTCAAATTTGAAAATTAAAGTCAAATTAGGCATATTTTT-TTGAGTTTAACAAATTACTAAAAAAGAAGAATATTCTTCTTTTAGTAATTACTTTTACTCTAATTTTCCATTTATCTTACTTATCTTATCCATTCTTTTTCTTTTCGATTTTTCGAGAA…
;
END;
