# Supplementary material
Source: MDPI journal article supplement (https://www.mdpi.com/1424-2818/14/8/677)
Supplement: s1 [file s1 › Supplementary Material S2 (ITS).txt]

#NEXUS
BEGIN DATA;
	DIMENSIONS NTAX=73 NCHAR=501;
	FORMAT DATATYPE = DNA GAP = - MISSING = ?;
	MATRIX
	Barleria_acanthoides ----------------------------------------CGGAAAGCGCCAAGGAAAACCGTAACGAAGCCCCCGCCCGAGCCCCGTCCGCGGCGCGCGGGCGGGGGCGGTCCGGAGCGCCTCACCTACAAAACGACTCTCGGCAACGGATATCTCGGCTCTCGCATCGATGAARAACGTAGCGAAATGCGATACTTGGTGTGAATTGCAGAATCCCGTGAACCATCGAGTCTTTGAACGCAAGTTGCGCCCGAACCCTTCGGGCCGAGGGCACGCCTGCCTGGGCGTCACGCATCCCCCCGCCCCGCGGGGGTGCGGAGACTGGCCTCCCGTGCGCCCCGGCGCGCGGCCGGCCCAAATGCAATCCCCCGGCGGCG…
	Barleria_argentea GCCTGCACGAGCAGACCGCGAACGCGAACGAACCCCGGCGCGGAAAGCGCCAAGGAAAACCTTAACGAAGCCCACGGCCGAGCCCCGTCCGCGGTGTGCGGCCGGCGGGCGGCCGGAGCGCCTCCACAACGAAACGACTCTCGGCAACGGATATCTCGGCTCTCGCATCGATGAAGAACGTAGCGAAATGCGATACTTGGTGTGAATTGCAGAATCCCGTGAACCATCGAGTCTTTGAACGCAAGTTGCGCCCGAAGCCTTCGGGCCGAGGGCACGCCTGCCTGGGCGTCACGCATCCCCCCGCCCCGAGGGGGTGCGGAGAATGGCCTCCCGTGCGCCCCGGCGCGCGGCCGGCCCAAATGCGATCCCCCGGCGGCGCCC…
	Barleria_argillicola GCCTGAACGAGCAGACCGCGAACGCGAACGAACCCCGGCGCGGAAAGCGCCAAGGAAAACCCTAACGAAGCCCCCGTCCGAGTCCCGTCCGCGGTGCGCGGGCGGGGGCGGTCCGGAGCGCCTCATCTACAGAACGACTCTCGGCAACGGATATCTCGGCTCTCGCATCGATGAAGAACGTAGCGAAATGCGATACTTGGTGTGAATTGCAGAATCCCGTGAACCATCGAGTCTTTGAACGCAAGTTGCGCCCGAAGCCTTCGGGCCGAGGGCACGCCTGCCTGGGCGTCACGCATCCCCCCGCCCCGCGGGGGTGCGGAGATTGGCCTCCCGTGCGCCTCGGCGCGCGGCCGGCCCAAATGCGATCCCCCGGCGGCG…
	Barleria_aristata -----------------------------------------GGAAAAGCCC?AGGAAAACC??AAAGAAGCCCCCGCCCGAGCCCCGTCCGCGGTGCGCGGGCGGCGGGCGGCCGGTGCGCCTCCACCGCTGAACGACTCTCGGCAACGGATATCTCGGCTCTCGCATCGATGAAGAACGTAGCGAAATGCGATACTTGGTGTGAATTGCAGAATCCCGTGAACCATCGAGTCTTTGAACGCAAGTTGCGCCCGAAGCCCTCGGGCCGAGGGCACGCCTGCCTGGGCGTCACGCATCCCCCCGCCYCGAGGGGGAGCGGAGAATGGCCTCCCGTG?GCCCCGGCGCGCGGCCGGCCCAAATGCGATCCCCCGGCGGCGCCC…
	Barleria_aucheriana GCCTGCACGAGCAGACCGCGAACGCGAACGAACCCCGGCGCGGAAAGCGCCAAGGAAAACCTTAACGAAGCCCACGGCCGAGCCCCGTCCGCGGCGTGCGGCCGGCGGGCGGCCGGAGCGCCTCCACTGCGAAACGACTCTCGGCAACGGATATCTCGGCTCTCGCATCGATGAAGAACGTAGCGAAATGCGATACTTGGTGTGAATTGCAGAATCCCGTGAACCATCGAGTCTTTGAACGCAAGTTGCGCCCGAAGCCTTCGGGCCGAGGGCACGCCTGCCTGGGCGTCACGCATCCCCCCGCCCCGAGGGGGTGCGGAGAATGGCCTCCCGTGCGCCCCGGCGCGCGGCCGGCCCAAATGCGATCCCCCGGCGGCGC…
	Barleria_baluganii GCCTCAACGAGCAGACCGCGAACGCGAACGAACCCCGGCGCGGAAAGCGCCAAGGAAAACCGTAACGAAGCCCCCGCCCGAGCCCCGTCCGCGGTGCGCGGGCGGCGGCGGTWCGGAGCGCCTCAACTACAAAACGACTCTCGGCAACGGATATCTCGGCTCTCGCATCGATGAAGAACGTAGCGAAATGCGATACTTGGTGTGAATTGCAGAATCCCGTGAACCATCGAGTCTTTGAACGCAAGTTGCGCCCGAAGCCTTCGGGCCGAGGGCACGCCTGCCTGGGCGTCACGCATCCCCCCGCCCCGAGGGGGTGCGGATACTGGCCTCCCGTGCGCCCCGGCGCGCGGCCGGCCCAAATGCGATCCCCCGGCGGCGTC…
	Barleria_bispinosa GCCTGGACGAGTAGACCGCGAACCAGAACGAACCCCGGCGCGGAACGCGCCAAGGAAAACCTTAACGAAGCCCCCGCCCGAGCCCCGTCCGCGGCGCGCGGGCGGGGGCGGTCCGGAGCGCCTCATCTACAAAACGACTCTCGGCAACGGATATCTCGGCTCTCGCATCGATGAAGAACGTAGCGAAATGCGATACTTGGTGTGAATTGCAGAATCCCGTGAACCATCGAGTCTTTGAACGCAAGTTGCGCCCGAAGCCTTCGGGCCGAGGGCACGCCTGCCTGGGCGTCACGCATCCCCCCGCCCCGCGGGGGTGCGGAGATTGGCCTCCCGTGCGCCTCGGCGTGCGGCCGGCCCAAATGCGATCCCCCGGCGGCGTC…
	Barleria_boehmii GCCTCAACGAGCAGACCGCGAACGCGAACGAACCCCGGCGCGGAAAGCGCCAAGGAAAACCCTAACGAAGCCCCCGCCCGAGCCCCGTCCGCGGTGCGCGGGCGGCGGCGGTGCGGAGCGCCTCAGCTACAAAACGACTCTCGGCAACGGATATCTCGGCTCTCGCATCGATGAAGAACGTAGCGAAATGCGATACTTGGTGTGAATTGCAGAATCCCGTGAACCATCGAGTCTTTGAACGCAAGTTGCGCCCGAAGCCTTCGGGCCGAGGGCACGCCTGCCTGGGCGTCACGCATCCCCCC-----GAGGGGGTGCGGATACTGGCCTCCCGTGCGCCTCGGCGCGCGGCCGGCCCAAATGCGATCCCCCGGCGGCGTCCG…
	Barleria_bolusii GCCTGAACGAGCAGACCGCGAACGCGAACGAACCCCGGCGCGGAAAGCGCCAAGGAAAACCTTAACGAAGCCCCCGTCCGAGCCCCGTCCGCGGCGCGCGGCCGGGGGCGGTCCGGAGCGCCTCATCTACACGACGACTCTCGGCAACGGATATCTCGGCTCTCGCATCGATGAAGAACGTAGCGAAATGCGATACTTGGTGTGAATTGCAGAATCCCGTGAACCATCGAGTCTTTGAACGCAAGTTGCGCCCGAAGCCTTCGGGCCGAGGGCACGCCTGCCTGGGCGTCACGCATCCCCCCGCCCC---------------------------------------------------------------------------…
	Barleria_bremekampii GCCTGAACGAGCAGACCGCGAACGAGAACGAACCCCGGGGGGGAGAGCGCCAAGGAAAACCGTAAGGAAGCCCCCGCCCGAGCCCCGTCCGCGGTGCGCGGGCGGGGGCGGTCCGGAGCGCCTCATCTGCAGAACGACTCTCGGCAACGGATATCTCGGCTCTCGCATCGATGAAGAACGTAGCGAAATGCGATACTTGGTGTGAATTGCAGAATCCCGTGAACCATCGAGTCTTTGAACGCAAGTTGCGCCCGAAGCCTTCGGGCCGAGGGCACGCCTGCCTGGGCGTCACGCATCCCCCCGCCCCGCGGGGGTGCGGAGATTGGCCTCCCGTGCGCCTCGGCGCGCGGCCGGCCCAAATGCGATCCCCCGGCGGCG…
	Barleria_cristata__BKF189455_ -------------------------------------------------------------------------------------------------------------------------------------------------------------------------------------------ATGCGATACTTGGTGTGAATTGCAGAATCCCGTGAACCATCGAGTCTTTGAACGCAAGTTGCGCCCGAGGCCTTCGGGCCGAGGGCACGCCTGCCTGGGCGTCACGCATCCCCCCTCCCCGCGGGGGTGCGGAGATTGGCCTCCCGTGCGCCTCGGCGCGCGGCCGGCCCAAATGCGATCCC…
	Barleria_cristata__Cultivated_form_3___SSP_040_ GCCTGAATGAGTAGACCGTGAACGAGAACGAACCCCGGCGTGGAAAGCACCAAGGAAAACCTTAATGAAGCCCCCGCCCGAGCCCCGTCCGTGGTGCGCGGGTGGGGGCAGTCCATAGCGCCTCACCTACAAAATGACTCTCGGCAACGGATATCTTAGCTCTCGCATCGATGAAGAACGTAGCAAAATGCGATACTTGGTGTGAATTGTAGAATCCCGTGAACCATCGAGTCTTTGAACGCAAGTTGCGCCCGAAGCCTTCAGGCTGAGGGCACGCCTGCCTGGGCGTCACGCATCCCCCCTCCCCGCGGGGGTGCGGAGATTGGCCTCCCATGTGCCTCGGCGCGCGGT…
	Barleria_cristata__Cultivated_form_3___SSP_060_ GCCTGAATGAGTAGACCGTGAACGAGAACGAACCCCGGCGTGGAAAGCACCAAGGAAAACCTTAATGAAGCCCCCGCCCGAGCCCCGTCCGTGGTGCGCGGGTGGGGGCAGTCCATAGCGCCTCACCTACAAAATGACTCTCGGCAACGGATATCTTAGCTCTCGCATCGATGAAGAACGTAGCAAAATGCGATACTTGGTGTGAATTGTAGAATCCCGTGAACCATCGAGTCTTTGAACGCAAGTTGCGCCCGAAGCCTTCAGGCTGAGGGCACGCCTGCCTGGGCGTCACGCATCCCCCCTCCCCGCGGGGGTGCGGAGATTGGCCTCCCATGTGCCTCGGCGCGCGGT…
	Barleria_cristata__Cultivated_form_3___SSP_070_ GCCTGAATGAGTAGACCGTGAACGAGAACGAACCCCGGCGTGGAAAGCACCAAGGAAAACCTTAATGAAGCCCCCGCCCGAGCCCCGTCCGTGGTGCGCGGGTGGGGGCAGTCCATAGCGCCTCACCTACAAAATGACTCTCGGCAACGGATATCTTAGCTCTCGCATCGATGAAGAACGTAGCAAAATGCGATACTTGGTGTGAATTGTAGAATCCCGTGAACCATCGAGTCTTTGAACGCAAGTTGCGCCCGAAGCCTTCAGGCTGAGGGCACGCCTGCCTGGGCGTCACGCATCCCCCCTCCCCGCGGGGGTGCGGAGATTGGCCTCCCATGTGCCTCGGCGCGCGGT…
	Barleria_cristata__Cultivated_form_3___SSP_133_ GCCTGAATGAGTAGACCGTGAACGAGAACGAACCCCGGCGTGGAAAGCACCAAGGAAAACCTTAATGAAGCCCCCGCCCGAGCCCCGTCCGTGGTGCGCGGGTGGGGGCAGTCCATAGCGCCTCACCTACAAAATGACTCTCGGCAACGGATATCTTAGCTCTCGCATCGATGAAGAACGTAGCAAAATGCGATACTTGGTGTGAATTGTAGAATCCCGTGAACCATCGAGTCTTTGAACGCAAGTTGCGCCCGAAGCCTTCAGGCTGAGGGCACGCCTGCCTGGGCGTCACGCATCCCCCCTCCCCGCGGGGGTGCGGAGATTGGCCTCCCATGTGCCTCGGCGCGCGGT…
	Barleria_cristata__Cultivated_form_2___SSP_042_ GCCTGAATGAATAGACCGTGAACGAGAACGAACCCCGGCGTAGAAAGCACCAAGGAAAACCTTAATGAAGCCCCCGCCCGAGCCCCGTCCGTGGTGCGCGGGTGGGGGCAGTCCATAACGCCTCACCTACAAAATGACTCTCGGCAACGGATATCTTATCTCTCGCATCGATGAAGAACGTAGCAAAATGCGATACTTGGTGTGAATTGTAGAATCCCGTGAACCATCGAGTCTTTGAATGCAAGTTGCGCCCGAAGCCTTCAGGCTGAGGGCACGCCTGCCTGGGCGTCACGCATCCCCCCTCCCCGCGGGGGTGCGGAGATTGGCCTCCCATGTGCCTCGGCGCGCGGT…
	Barleria_cristata__Cultivated_form_2___SSP_062_ GCCTGAATGAATAGACCGTGAACGAGAACGAACCCCGGCGTAGAAAGCACCAAGGAAAACCTTAATGAAGCCCCCGCCCGAGCCCCGTCCGTGGTGCGCGGGTGGGGGCAGTCCATAACGCCTCACCTACAAAATGACTCTCGGCAACGGATATCTTATCTCTCGCATCGATGAAGAACGTAGCAAAATGCGATACTTGGTGTGAATTGTAGAATCCCGTGAACCATCGAGTCTTTGAATGCAAGTTGCGCCCGAAGCCTTCAGGCTGAGGGCACGCCTGCCTGGGCGTCACGCATCCCCCCTCCCCGCGGGGGTGCGGAGATTGGCCTCCCATGTGCCTCGGCGCGCGGT…
	Barleria_cristata__Cultivated_form_2___SSP_071_ GCCTGAATGAGTAGACCGTGAACGAGAACGAACCCCGGCGTGGAAAGCACCAAGGAAAACCTTAATGAAGCCCCCGCCCGAGCCCCGTCCGTGGTGCGCGGGTGGGGGCAGTCCATAGCGCCTCACCTACAAAATGACTCTCGGCAACGGATATCTTAGCTCTCGCATCGATGAAGAACGTAGCAAAATGCGATACTTGGTGTGAATTGTAGAATCCCGTGAACCATCGAGTCTTTGAACGCAAGTTGCGCCCGAAGCCTTCAGGCTGAGGGCACGCCTGCCTGGGCGTCACGCATCCCCCCTCCCCGCGGGGGTGCGGAGATTGGCCTCCCATGTGCCTCGGCGCGCGGT…
	Barleria_cristata__Cultivated_form_2___SSP_135_ GCCTGAATGAGTAGACCGTGAACGAGAACGAACCCCGGCGTGGAAAGCACCAAGGAAAACCTTAATGAAGCCCCCGCCCGAGCCCCGTCCGTGGTGCGCGGGTGGGGGCAGTCCATAGCGCCTCACCTACAAAATGACTCTCGGCAACGGATATCTTAGCTCTCGCATCGATGAAGAACGTAGCAAAATGCGATACTTGGTGTGAATTGTAGAATCCCGTGAACCATCGAGTCTTTGAACGCAAGTTGCGCCCGAAGCCTTCAGGCTGAGGGCACGCCTGCCTGGGCGTCACGCATCCCCCCTCCCCGCGGGGGTGCGGAGATTGGCCTCCCATGTGCCTCGGCGCGCGGT…
	Barleria_cristata__Nandi_hills___SSP_004_ GCCCGAACGAGCAGACCGCGAACGCGAACGAACCGCGGCATGGAAAGCGCCAAGGAAAACCTTAACGAAGACCCCGCCCTAGCCCCGTCCGCAATGCGCGTGCGCGGGCGGTCCAGGGTGCCTCATCTACAGAACGACTCTCGACAACGGATATGTCGGCTCTCGCATCGATGAAGAACGTAGTGAAATGTGATACTTGGTGTGAATTGCAGAATCCCGTGAACCATCAAGTCTTTGAAGGCAAATTGTGCCCGAAGCCTTCGGGCCGAGGG-ACGCCTGCCTGGGCATCATGCATCCCCCCTCCCCGAGAGGGTGCAGAGATTGGCCTCCTGTGCGCCTCGGCGCGCAGCCGGCCC…
	Barleria_cristata__Nandi_hills___SSP_051_ GCCCGAACGAGCAGACCGCGAACGCGAACGAACCGCGGCATGGAAAGCGCCAAGGAAAACCTTAACGAAGACCCCGCCCTAGCCCCGTCCGCAATGCGCGTGCGCGGGCGGTCCAGGGTGCCTCATCTACAGAACGACTCTCGACAACGGATATGTCGGCTCTCGCATCGATGAAGAACGTAGTGAAATGTGATACTTGGTGTGAATTGCAGAATCCCGTGAACCATCAAGTCTTTGAAGGCAAATTGTGCCCGAAGCCTTCGGGCCGAGGG-ACGCCTGCCTGGGCATCATGCATCCCCCCTCCCCGAGAGGGTGCAGAGATTGGCCTCCTGTGCGCCTCGGCGCGCAGCCGGCCC…
	Barleria_cristata__Nandi_hills___SSP_069_ GCCCGAACGAGCAGACCGCGAACGCGAACGAACCGCGGCATGGAAAGCGCCAAGGAAAACCTTAACGAAGACCCCGCCCTAGCCCCGTCCGCAATGCGCGTGCGCGGGCGGTCCAGGGTGCCTCATCTACAGAACGACTCTCGACAACGGATATGTCGGCTCTCGCATCGATGAAGAACGTAGTGAAATGTGATACTTGGTGTGAATTGCAGAATCCCGTGAACCATCAAGTCTTTGAAGGCAAATTGTGCCCGAAGCCTTCGGGCCGAGGG-ACGCCTGCCTGGGCATCATGCATCCCCCCTCCCCGAGAGGGTGCAGAGATTGGCCTCCTGTGCGCCTCGGCGCGCAGCCGGCCC…
	Barleria_cristata__Nandi_hills___SSP_131_ GCCCGAACGAGCAGACCGCGAACGCGAACGAACCGCGGCATGGAAAGCGCCAAGGAAAACCTTAACGAAGACCCCGCCCTAGCCCCGTCCGCAATGCGCGTGCGCGGGCGGTCCAGGGTGCCTCATCTACAGAACGACTCTCGACAACGGATATGTCGGCTCTCGCATCGATGAAGAACGTAGTGAAATGTGATACTTGGTGTGAATTGCAGAATCCCGTGAACCATCAAGTCTTTGAAGGCAAATTGTGCCCGAAGCCTTCGGGCCGAGGG-ACGCCTGCCTGGGCATCATGCATCCCCCCTCCCCGAGAGGGTGCAGAGATTGGCCTCCTGTGCGCCTCGGCGCGCAGCCGGCCC…
	Barleria_cristata__Uttarakhand___SSP_023_ GCCTGAATGAGTAGACCGCGAACGAGAACGAACCCTGGCATGGAAAGCGCTAAGGAAAACCTTAACGAAGCCCCCGCCCGAGCCCCGTCCGCAGTGCACGGGCGGGGGCGGTCCAGAGCACCTCACCTACAAAACGACTCTCGACAATGGATATCTCGGCTCTCGCATCGATGAAGAACGTAGCGAAATGAGATACTTGGTGTGAATTGTAGAATCCCGTGAACCATCGAGTCTTTGAACGCAAGTTGCGCCCGAAGCCTTCAGGCCGAGGGCACGCCCGCCTGGGC---------TCCCGTGCACGGCGAGGGTGCGGAGATTGGCTTCC-GTGCACCTCGATGCACGGTTGGCCC…
	Barleria_cristata__Uttarakhand___SSP_055_ GCCTGAATGAGTAGACCGCGAACGAGAACGAACCCTGGCATGGAAAGCGCTAAGGAAAACCTTAACGAAGCCCCCGCCCGAGCCCCGTCCGCAGTGCACGGGCGGGGGCGGTCCAGAGCACCTCACCTACAAAACGACTCTCGACAATGGATATCTCGGCTCTCGCATCGATGAAGAACGTAGCGAAATGAGATACTTGGTGTGAATTGTAGAATCCCGTGAACCATCGAGTCTTTGAACGCAAGTTGCGCCCGAAGCCTTCAGGCCGAGGGCACGCCTGCCTGGGC---------TCCCGTGCACGGCGAGGGTGCGGAGATTGGCCTCC-GTGCACCTCGATGCACGGTTGGCCC…
	Barleria_cristata__Uttarakhand___SSP_065_ GCCTGAATGAGTAGACCGCGAACGAGAACGAACCCTGGCATGGAAAGCGCTAAGGAAAACCTTAACGAAGCCCCCGCCCGAGCCCCGTCCGCAGTGCACGGGCGGGGGCGGTCCAGAGCACCTCACCTACAAAACGACTCTCGACAATGGATATCTCGGCTCTCGCATCGATGAAGAACGTAGCGAAATGAGATACTTGGTGTGAATTGTAGAATCCCGTGAACCATCGAGTCTTTGAACGCAAGTTGCGCCCGAAGCCTTCAGGCCGAGGGCACGCCCGCCTGGGC---------TCCCGTGCACGGCGAGGGTGCGGAGATTGGCTTCC-GTGCACCTCGATGCACGGTTGGCCC…
	Barleria_cristata__Uttarakhand___SSP_134_ GCCTGAATGAGTAGACCGCGAACGAGAACGAACCCTGGCATGGAAAGCGCTAAGGAAAACCTTAACGAAGCCCCCGCCCGAGCCCCGTCCGCAGTGCACGGGCGGGGGCGGTCCAGAGCACCTCACCTACAAAACGACTCTCGACAATGGATATCTCGGCTCTCGCATCGATGAAGAACGTAGCGAAATGAGATACTTGGTGTGAATTGTAGAATCCCGTGAACCATCGAGTCTTTGAACGCAAGTTGCGCCCGAAGCCTTCAGGCCGAGGGCACGCCTGCCTGGGC---------TCCCGTGCACGGCGAGGGTGCGGAGATTGGCCTCC-GTGCACCTCGATGCACGGTTGGCCC…
	Barleria_grandiflora GCCTGAACGAGCAGACCGCGAACGCGAACGAACCCCGGCGGGGAAAGCGCCAAGGAAAACCGAAACGAAGCCCCCGCCCGAGCCCCGTCCGCGGTGTGCGGGCGGCGGGCGGCCGGAGCGCCTCCACAACGAAACGACT?T?GG?AACGGATAT?TCGGCTCT?GCATCGATGAAGAACGTAG?GAAATGC?ATACTTGGTGTGAATTGCAGAATCCCGTGAACCATCGAGTCTTTGAACGCAAGTTGCGCCCGAAGCCTTCGGGCCGAGGGCACGCCTGCCTGGGCGTCACGCATCCCCCCGCCCCGAGGGGGCGCGGAGAATGGCCTCCCGTGCGCCTCGGCGCGCGGCCGGCCCAAATGCGATCCCCCGGCGGCG…
	Barleria_grandipetala GCCCGCACGAGCAGACCGCGAACGCGAACGAACCCCGGCGCGGAAAGCGCCAAGGAAAACAGCAACGAGGCCCCCGCCCGAGCCCCGTCTGCGGTGCGCGGGCGGCGGGCGGCCGGGGCGCCTGCGCAACGAAACGACTCTCGGCAACGGATATCTCGGCTCTCGCATCGATGAAGAACGTAGCGAAATGCGATACTTGGTGTGAATTGCAGAATCCCGTGAACCATCGAGTCTTTGAACGCAAGTTGCGCCCGAGGCCTTCGGGCCGAGGGCACGCCTGCCTGGGCGTCACGCATCCCCCCGCCCCGAGGGGGCGCGGAGAATGGCCTCCCGTGCGCCTCGGCGCGCGGCCGGCCCAAATGCGATCCCCCGGCGGC…
	Barleria_grandis -------------------------------------------------------------------------------------------------------CACGGGCGGCCGGAGCGCCTCCACAACGAAACGACTCTCGGCAACGGATATCTCGGCTCTCGCATCGATGAAGAACGTAGCGAAATGCGATACTTGGTGTGAATTGCAGAATCCCGTGAACCATCGAGTCTTTGAACGCAAGTTGCGCCCGAAGCCTTCGGGCCGAGGGCACGCCTGCCTGGGCGTCACGCATCCCCCCGCCCCGAGGGGGAGCGGAGAATGGCCTCCCGTGCGCCCCGGCGCGCGGCCGGCCCAAATGCGATCCCCCGGCGGCGCCCG…
	Barleria_grootbergensis GCCGACACGAGCAGACCGCGAACGCGAACGAACCCCGGCGCGGAAAGCGCCAAGGAAAACCGAAACGAAGCCCCCGCCCGAGCCCCGTCCGCGGTGCGCGGGCGGCGGGCGGCCGGAGCGCCTCCACGACTGAACGACTCTCGGCAACGGATATCTCGGCTCTCGCATCGATGAAGAACGTAGCGAAATGCGATACTTGGTGTGAATTGCAGAATCCCGTGAACCATCGAGTCTTTGAACGCAAGTTGCGCCCGAGGCCTTCGGGCCGAGGGCACGCCTGCCTGGGCGTCACGCATCCCCCCGCCCCGAGGGGGCGCGGAGAATGGCCTCCCGTGCGCCTCGGCGCGCGGCCGGCCCAAATGCGATCCCCCGGCG…
	Barleria_heterotricha GCCTGAACGAGCAGACCGCGAACGCGAACGAACCCCGGCGCGGAATGCGCCAAGGAAAACCGTAACGAAGCCCCCGCCCGAGCCCCGTCCGCGGTGCGCGGGCGGGGGCGGTCCGGAGCGCCTCATCTGCATAACGACTCTCGGCAACGGATATCTCGGCTCTCGCATCGATGAAGAACGTAGCGAAATGCGATACTTGGTGTGAATTGCAGAATCCCGTGAACCATCGAGTCTTTGAACGCAAGTTGCGCCCGAGGCCTTCGGGCCGAGGGCACGCCTGCCTGGGCGTCACGCATCCCCCCGCCATGAGGGGGTGCGGAGATTGGCCTCCCGTGCGCCTCGGCGCGCGGCCGGCCTAAATGCGATCCCCCGGCGGC…
	Barleria_hildebrandtii GCCCCAACGAGCAGACCGCGAACGCGAACGAACCCCGGCGCGGAAAGCGCCAAGGAAAACCGTAACGGAGCCCCAGCCCGAGCCCCGTCCGCGGGTCGCGGGCGGGGGCCGGCCGGAGCGCCTCACGGACAAAACGACTCTCGGCAACGGATATCTCGGCTCTCGCATCGATGAAGAACGTAGCGAAATGCGATACTTGGTGTGAATTGCAGAATCCCGTGAACCATCGAGTCTTTGAACGCAAGTTGCGCCCGAAGCCTTCGGGCCGAGGGCACGCCTGCCTGGGCGTCACGCATCCCCCCGCCCCGTGGGGGTGCGGAGAATGGCCTCCCGTGCGCCCCGGCGCGCGGCCGGCCCAAATGCGATCCCCCGGCGG…
	Barleria_involucrata GCCCGAACGAGCAGACCGCGAACGCGAACGAACCCCGGCGCGGAAAGCGCCAAGGAAAACCGAAACGGAGCCCCCSCCCS???????????????????????????????????????????????GACAAAACGACTCTCGGCAACGGATATCTCGGCTCTCGCAT?GATGAAGAACGTAG?GAAATGCGATACTTGGTG?GAATTGCAGAATCCCGTGAACCAT?GAGTCTTTGAACGCAAGTTGCGCCWGAAGCCTTCGGGCCGAGGGCACGCCYGCCTGGGCGTCACGCATCCCCCCGCCCCGCGGGGGTGCGGACACTGGCCTCCCGTGCGCCCCGGCGCGCGGCCGGCCCAAATGCGATCCCCCGGCGGCG…
	Barleria_kaloxytona GCCTGCGCGAGCAGACCGCGAACGCGAACGAACCCCGGCGCGGAACGCGCCAAGGAAAACCTGAGCGAAGCCCCCGTCCGAGCCCCGTCCGCGG-GCGCCGGCGGGGGGCGGCCGGAGCGCCTCCGGCTCGAAACGACTCTCGGCAACGGATATCTCGGCTCTCGCATCGATGAAGAACGTAGCGAAATGCGATACTTGGTGTGAATTGCAGAATCCCGTGAACCATCGAGTCTTTGAACGCAAGTTGCGCCCGAGGCCCCCGGGCCGAGGGCACGCCTGCCTGGGCGTCACGCATCCCCCCGCCCCGCGGGGGAGCGGAGAATGGCCTCCCGTGCGCCCCGGCGCGCGGCCGGCCCAAATGCGATCCCCCGGCGGCGC…
	Barleria_kitchingii GCCTGAACGAGCAGACCGCGAACGCGAACGAACCCCGGCGCGGAGAGCGCCAAGGAAAACCGAAACGAAGCCCCCGCCCGAGCCCCGTCCGCGGTGCGCGGGCGGGGGCGGTCCGGAGCGCCTCAACGACGAAACGACTCTCGGCAACGGATATCTCGGCTCTCGCATCGATGAAGAACGTAGCGAAATGCGATACTTGGTGTGAATTGCAGAATCCCGTGAACCATCGAGTCTTTGAACGCAAGTTGCGCCCGAAGCCTTCGGGCCGAGGGCACGCCTGCCTGGGCGTCACGCATCCCCCCGCCCCGCGGGGGTGCGGATACTGGCCTCCCGTGCGCCTCGGCGCGCGGCCGGCCCAAATGCGATCCCCCGGCGGCGT…
	Barleria_lancifolia GCCCACACGAGCAGACCGCGAACGCGAACGAACCCCGGCGCGGAAAGCGCCAAGGAAAACCGAAACGAAGCCCCCGCCCGAGCCCCGTCCGCGGTGCGCGGGCGGCGGGCGGCCGGAGCGCCTCCACGACTGAACGACTCTCGGCAACGGATATCTCGGCTCTCGCATCGATGAAGAACGTAGCGAAATGCGATACTTGGTGTGAATTGCAGAATCCCGTGAACCATCGAGTCTTTGAACGCAAGTTGCGCCCGAGGCCTTCGGGCCGAGGGCACGCCTGCCTGGGCGTCACGCATCCCCCCGCCCCGAGGGGGCGCGGAGAATGGCCTCCCGTGCGCCTCGGCGCGCGGCCGGCCCAAATGCGATCCCCCGGCGGCGC…
	Barleria_leandrii GCCTGCCCGAGCGGACCGCGAACGCGAACGAACCCCGGCGCGGAACGCGCCAAGGAAAACCTGAGCGAAGCCCCCGACCGAGCCCCGTCCGCGG-GSGCCGGCGGGGGCSGGCCGGAGCGCCTCCGACGCCGAACGACTCTCGGCAACGGATATCTCGGCTCTCGCATCGATGAAGAACGTAGCGAAATGCGATACTTGGTGTGAATTGCAGAATCCCGTGAACCATCGAGTCTTTGAACGCAAGTTGCGCCCGAGGCCCTCGGGCCGAGGGCACGCCTGCCTGGGCGTCACGCATCCCCCCGCCCCGCGGGGGAGCGGAGATTGGCCTCCCGTGCGCCCCGGCGCGCGGCCGGCCCAAATGCGATCCCCCGGCGGCGCCC…
	Barleria_limnogeton GCCTCAACGAGCAGACCGCGAACGCGAACGAACCCCGGCGCGGAAAGCGCCAAGGAAAACCGTAACGAAGCCCACGCCCGAGCCCCGTCCGCGGCGCGCGGGCGGGGGGCGGCCGGGGCGCCTCATCAACGAAACGACTCTCGGCAACGGATATCTCGGCTCTCGCATCGATGAAGAACGTAGCGAAATGCGATACTTGGTGTGAATTGCAGAATCCCGTGAACCATCGAGTCTTTGAACGCAAGTTGCGCCCGAAGCCTCCGGGCCGAGGGCACGCCTGCCTGGGCGTCACGCATCCCCCCGCCCCGCGGGGGCGCGGAGAATGGCCTCCCGTGCGCC?CGGCGCGCGGCCGGCCCAAATGCGATCCCCCGGCGGCGT…
	Barleria_lupulina GCCTGCCCGAGCAGACCGCGAACGCGAACGAACCCCGGCGCGGAACGCGCCAAGGAAAACCCGAGCGAAGCCCCCGCCCGAGCCCCGTCCGCGG-GCGTCGGCGGGGGGCCGGCGGAGCGCCTCCGGCGCCGAACGACTCTCGGCAACGGATATCTCGGCTCTCGCATCGATGAAGAACGTAGCGAAATGCGATACTTGGTGTGAATTGCAGAATCCCGTGAACCATCGAGTCTTTGAACGCAAGTTGCGCC-GAGGCCCTCGGGCCGAGGGCACGCCTGCCTGGGCGTCACGCATCCCCCCGCCCCGCGGGGGGGCGGAGAATGGCCTCCCGTGCGCCCCGGCGCGCGGCCGGCCCAAGTGCGATCCCCCGGCGGCGCCC…
	Barleria_lupulina_2_ GCCTGCCCGAGCAGACCGCGAACGCGAACGAACCCCGGCGCGGAACGCGCCAAGGAAAACCCGAGCGAAGCCCCCSCCCGAGCCCCGTCCGCGG-GCGTCGGCGGGGGGCGGCCGGAGCGCCTCCGGCGCCCAAAGACTCTCGGCAACGGATATCTCGGCTCTCGCATCGATGAAGAACGTATCGAAATGCGATACTTGGTGTGAATTGCAGAATCCCGTGAACCATCGAGTCTTTGAACGCAAGTTGCGCCCGAGGCCCTCGGGCCGAGGGCACGCCTGCCTGGGCGTCACGCATCCCCCCGCCCCGCGGGGGGGCGGAGAATGGCCTCCCGTGCGCCCCGGCGCGCGGCCGGCCCAAGTGCGATCCCCCGGCGGCG…
	Barleria_mackenii GCCAACACGAGCAGACCGCGAACGCGAACGAACCCCGGCGCGGAAAGCGCCAAGGAAAACCGAAAAGAAGCCCCTGCCCGAGCCCCGTCCGCGGTGCGCGGGCGGCGGGCGGCCGGGGCGCCTCCACGACTGAACGACTCTCGGCAACGGATATCTCGGCTCTCGCATCGATGAAGAACGTAGCGAAATGCGATACTTGGTGTGAATTGCAGAATCCCGTGAACCATCGAGTCTTTGAACGCAAGTTGCGCCCGAGGCCTCCGGGCCGAGGGCACGCCTGCCTGGGCGTCACGCATCCCCCCGCCCCGAGGGGGCGCGGAGAATGGCCTCCCGTGCGCCTCGGCGCGCGGCCGGCCCAAATGCGATCCCCCGGCGGCGCCC…
	Barleria_maclaudii GCCTGCACGAGCAGACCGCGAACG?GAACGAACCCCGGCGCGGAAAGCGCCAAGGAAAACCGAAACGAAGCCCCCGCCCGAGCCCCGTCCGCGGTGCGCGGGCGGCGGGCGGCCGGAGCGCCTCCACGACGAAACGACTCTCGGCAACGGATATCTCGGCTCTCGCATCGATGAAGAACGTAGCGAAATGCGATACTTGGTGTGAATTGCAGAATCCCGTGAACCATCGAGTCTTTGAACGCAAGTTGCGCCCGAAGCCTTCGGGCCGAGGGCACGCCTGCCTGGGCGTCACGCATCCCCCCGCCCCGAGGGGGCGCGGAGAATGGCCTCCCGTGCGCCTCGGCGCGCGGCCGGCCCAAAAGCGATCCCCCGGCGGCGCC…
	Barleria_meeuseana GCCTGAACGAGCAGACCGCGAACGCGAACGAACCCCGGCGCGGAAAGCGCCAAGGAAAACCGTAACGAAGCCCCCGTCCGAGTCCCGTCCGCGGTGCGCGGGCGGGGGCGGTCCGGAGCGCCTCGCCTACAAAACGACTCTCGGCAACGGATATCTCGGCTCTCGCATCGATGAAGAACGTAGCGAAATGCGATACTTGGTGTGAATTGCAGAATCCCGTGAACCATCGAGTCTTTGAACGCAAGTTGCGCCCGAAGCCTTCGGGCCGAGGGCACGCCTGCCTGGGCGTCACGCATCCCCCCGCCCCGCGGGGGTGCGGAGATTGGCCTCCCGTGCGCCCCGGCGCGCGGCCGGCCCAAATGCGATCCCCCGGCGGCGTC…
	Barleria_merxmuelleri GCCTGAACGAGCAGACCGCGAACGCGAACGAACCCCGGCGCGGAAAGCGCCAAGGAAAACCGAAACGAAGCCCCCGTCCGAGCCCCGTCCGCGGCGCGCGGGCGGGGGCGGTCCGGAGCGCCTCACCTACAAAACGACTCTCGGCAACGGATATCTCGGCTCTCGCATCGATGAAGAACGTAGCGAAATGCGATACTTGGTGTGAATTGCAGAATCCCGTGAACCATCGAGTCTTTGAACGCAAGTTGCGCCCGAAGCCTTCGGGCGGAGGGCACGCCTGCCTGGGCGTCACGCATCCCCCCGCCCCGCGGGGGTGCGGAGATTGGCCTCCCGTGCGCCTCGGCGCGCGGCCGGCCCAAATGCGATCCCCCGGCGGC…
	Barleria_meyeriana GCCTGAACGAGCAGACCGCGAACGCGAACGAACCCCGGCGCGGAAAGCGCCAAGGAAAACCGTAACGAAGCCCCCGCCCGAGCCCCGTCCGCGGTGCGCGGGCGGCGGGCGGCCGGAGCGCCTCAAAACCTGAACGACTCTCGGCAACGGATATCTCGGCTCTCGCATCGATGAAGAACGTAGCGAAATGCGATACTTGGTGTGAATTGCAGAATCCCGTGAACCATCGAGTCTTTGAACGCAAGTTGCGCCCGAAGCCCCCGGGCCGAGGGCACGCCTGCCTGGGCGTCACGCATCCCCCCGCCCCGAGGGGGAGCGGAGAATGGCCTCCCGTGTGCCCCGGCGCGCGGCCGGCCCAAATGCGATCCCCCGGCGGTGCC…
	Barleria_mutabilis GCCTGAACGAGCAGACCGCGAACGCGAACGAACCCCGGCGCGGAAAGCGCCAAGGAAAACCGTAACGAAGCCCCCGCCCGAGCCCCGTCCGCGGTGCGCGGGCGGGGGCGGTCCGGAGCGCCTCATCTGCAAAACGACTCTCGGCAACGGATATCTCGGCTCTCGCATCGATGAAGAACGTAGCGAAATGCGATACTTGGTGTGAATTGCAGAATCCCGTGAACCATCGAGTCTTTGAACGCAAGTTGCGCCCGAAGCCTTCGGGCCGAGGGCACGCCTGCCTGGGCGTCACGCATCCCCCCG----GAGGGGGTGCGGAGATTGGCCTCCCGTGCGCCTCGGCGTGCGGCCGGCCTAAATGCGATCCCCCGGCGGCGTC…
	Barleria_nitida GCCTGAACGAGCAGACCGCGAACGCGAACGAACCCCGGCGCGGAAAGCGCCAAGGAAAACCGTAACGAAGCCCCCGCCCGAGCCCCGTCCGCGGTGCGCGGGCGGGGGCGGTCCGGAGCGCCTCACCTACAAAACGACTCTCGGCAACGGATATCTCGGCTCTCGCATCGATGAAGAACGTAGCGAAATGCGATACTTGGTGTGAATTGCAGAATCCCGTGAACCATCGAGTCTTTGAACGCAAGTTGCGCCCGAAGCCTTCGGGCCGAGGGCACGCCTGCCTGGGCGTCACGCATCCCCCCGCCCCGCGGGGGTGCGGAGATTGGCCTCCCGTGCGCCTCGGCGCGCGGCCGGCCCAAATGCGATCCCCCGGCGGCGTCCGT…
	Barleria_obtusa GCCTGAACGAGCAGACCGCGAACGCGAACGAACCCCGGCGCGGAAAGCGCCAAGGAAAACCGTAACGAAGCCCCCGCCCSARCCCCGTCCGCGGTGCGCGGTCGGGGGGGGGACGGAACGCCTCATCTATATAACGACTCTCGGCAACGGATATCTCGGCTCTCCCATCCATGAAAAAAGTAACGAAATGCGATACTTGGTGTGAATTGCAAAATCCCGTGAACCATCCAGTCTTTTAACGCAAGTTGCGCCCGAAACCTTCCGGCTGAAGGCACGCCTGCCTGGGCGTCACGCATCCCCCC?????GAGGGGGTGCGGAGATTGGCCTCCCGTGCGCCTCGGCGCGCGGCCGGCCCAAATGCGATCCCCCGGCGGCGTCCGT…
	Barleria_oenotheroides GCCTGCACGAGCAGACCGCGAACGCGAACGAACCCCGGCGCGGAAAGCGCCAAGGACAACCGTAACGAAGC----GCCCGGGCCCCGTCCGCGGGGC-------------GGCCGGCGCGCCTCGCCTACAAAACGACTCTCGGCAACGGATATCTCGGCTCTCGCATCGATGAAGAACGTAGCGAAATGCGATACTTGGTGTGAATTGCAGAATCCCGTGAACCATCGAGTCTTTGAACGCAAGTTGCGCCCGAAGCCCTCGGGCCGAGGGCACGCCTGCCTGGGCGTCACGCATCCCCCCGCCCCGCGGGGGTGCGGAGGATGGCCCCCCGTGCGCCTCGGCGCGCGGCCGGCCCAAATGCGATCCCCCGGCGG…
	Barleria_oenotheroides_2_ GCCTGCACGAGCAGACCGCGAACGCGAACGAACCCCGGCGCGGAAAGCGCCAAGGAGAACCGTAGCGAAGC----GCCCGGGCCCCGTCCTTGGGGC-------------GGCCGGCGCGCCTCACCTACAAAACGACTCTCGGCAACGGATATCTCGGCTCTCGCATCGATGAAGAACGTAGCGAAATGCGATACTTGGTGTGAATTGCAGAATCCCGTGAACCATCGAGTCTTTGAACGCAAGTTGCGCCCGAAGCCCTCGGGCCGAGGGCACGCCTGCCTGGGCGTCACGCATCCCCCCGCCCCGCGGGGGTGCGGAGGATGGCCCCCCGTGCGCCTCGGCGCGCGGCCGGCCCAAATGCGATCCCCCGG…
	Barleria_ovata GCCTGAACGAGCAGACCGCGAACGCGAACGAACCCCGGCGCGGAAAGCGCCAAGGAAAACCTTAACGAAGCCCCCGCCCGAGCCCCGTCCGCGGTGCGCGGGCGGGGGCGGTCCGGAGCGCCTCATCCACAAAACGACTCTCGGCAACGGATATCTCGGCTCTCGCATCGATGAAGAACGTAGCGAAATGCGATACTTGGTGTGAATTGCAGAATCCCGTGAACCATCGAGTCTTTGAACGCAAGTTGCGCCCGAAGCCTTCGGGCCGAGGGCACGCCTGCCTGGGCGTCACGCATCCCCCCGCCCCGAGGGGGTGCGGAGATTGGCCTCCCGTGCGCCTCGGCGCGCGGCCGGCCCAAATGCGATCCCCCGGCGGCGTCCGTC…
	Barleria_parvispina GCCTGCCCGAGCGGACCGCGAACGCGAACGAACCCCGGCGCGGAACGCGCCAAGGAAAACCTGAGCGAAGCCCCCGACCGAGCCCCGTCCGCGG-GCGCCGGCGGGGGCCGGCCGGAGGGCCTCCGGCGCCGAACGACTCTCGGCAACGGATATCTCGGCTCTCGCATCGATGAAGAACGTAGCGAAATGCGATACTTGGTGTGAATTGCAGAATCCCGTGAACCATCGAGTCTTTGAACGCAAGTTGCGCCCGAGGCCCTCGGGCCGAGGGCACGCCTGCCTGGGCGTCACGCATCCCCCCGCCCCGCGGGGGAGCGGAGAATGGCCTCCCGTGCGCCCCGGCGCGCGGCCGGCCCAAATGCGATCCCCCGGCGGCGC…
	Barleria_prionitis GCCTGCGCGAGCAGACCGCGAACGCGAACGAACCCCGGCGCGGAACGCGCCAAGGAAAACACGAGCGAAGCCCCCGCCCGAGCCCCGTCCGCGG-GCGTCGGCGGGGGCCGGCCGGAGCGCCTCCGGCGCCGAACGACTCTCGGCAACGGATATCTCGGCTCTCGCATCGATGAAGAACGTAGCGAAATGCGATACTTGGTGTGAATTGCAGAATCCCGTGAACCATCGAGTCTTTGAACGCAAGTTGCGCCCGAGGCCCCCGGGCCGAGGGCACGCCTGCCTGGGCGTCACGCATCCCCCCGCCCCGCGGGGGAGCGGAGAATGGCCTCCCGTGCGCCCCGGCGCGCGGCCGGCCCAAATGCGATCCCCCGGCGGCGCC…
	Barleria_pseudosomalia GCCTCAACGAGCAGACCGCGAACGCGAACGAACCCCGGSGCGGAAAGCGCCMAGGAAAAMCCAAACGAARCCCCCGCCCGAGCCCCGTCCGCGGTGCGCGGGCGGCGGCGGTGCGGAGCGCCTCGGCTACAGAACGACTCTCGGCAACGGATATCTCGGCTCTCGCATCGATGAAGAACGTAGCGAAATGCGATACTTGGTGTGAATTGCAGAATCCCGTGAACCATCGAGTCTTTGAACGCAAGTTGCGCCCGAAGCCCTCGGGCCGAGGGCACGCCTGCCTGGGCGTCACGCATCCCCCCGCCCCGAGGGGGTGCGGATACTGGCCTCCCGTGCGCCTCGGCGCGCGGCCGGCCCAAATGCGATCCCCCGGCGG…
	Barleria_puberula GCCTGAACGAGCAGACCGCGAACGCGAACGAACCCCGGCGCGGAAAGCGCCAAGGAAAACCGTAACGAAGCCCCCGCCCGAGCCCCGTCCGCGGTGCGCGGGCGGCGGGCGGCCGGAGCGCCTCCGCAACTGAACGACTCTCGGCAACGGATATCTCGGCTCTCGCATCGATGAAGAACGTAGCGAAATGCGATACTTGGTGTGAATTGCAGAATCCCGTGAACCATCGAGTCTTTGAACGCAAGTTGCGCCCGAAGCCCCCGGGCCGAGGGCACGCCTGCCTGGGCGTCACGCATCCCCCCGCCCCGAGGGGGCGCGGAGAATGGCCTCCCGTGCGCCCCGGCGCGCGGCCGGCCCAAATGCGATCCCCCGGCGGCGCCC…
	Barleria_quadrispina GCCTGCGCGAGCAGACCGCGAACGCGAACGAACCCCGGCGCGGAACGCGCCAAGGAAAACACGAGCGAAGCCCCCGTCCGAGCCCCGTCCGCGG-GCGCCGGCGGGGGCCGGCCGGAGCGCCTCCTGCGCAGAACGACTCTCGGCAACGGATATCTCGGCTCTCGCATCGATGAAGAACGTAGCGAAATGCGATACTTGGTGTGAATTGCAGAATCCCGTGAACCATCGAGTCTTTGAACGCAAGTTGCGCCCGAGGCCCTCGGGCCGAGGGCACGCCTGCCTGGGCGTCACGCATCCCCCCGCCCCGCGGGGGAGCGGAGACTGGCCTCCCGTGCGCCCCGGCGCGCGGCCGGCCCAAATGCGATCCCCCGGCGGCG…
	Barleria_richardsiae GCCCACACGAGCAGACCGCGAACGCGAACGAACCCCGGCGCGGAAAGCGCCAAGGAAAACAGCAACGGAGCCCCCGCCCGAGCCCCGTCCGCGGTGCGCGGGCGGCGGGCGGCCGGGGCGCCTGCGCAACGAAACGACTCTCGGCAACGGATATCTCGGCTCTCGCATCGATGAAGAACGTAGCGAAATGCGATACTTGGTGTGAATTGCAGAATCCCGTGAACCATCGAGTCTTTGAACGCAAGTTGCGCCCGAAGCCTTCGGGCCGAGGGCACGCCTGCCTGGGCGTCACGCATCCCCCCGCCCCGAGGGGGCGCGGAGAATGGCCTCCCGTGCGCCTCGGCGCGCGGCCGGCCCAAATGCGATCCCCCGGCGGCG…
	Barleria_splendens GCCTGCACGAGCAGACCGCGAACGCGAACGAACCCCGGCGCGGAATGCGCCAAGGAAAACCGTAACGAAGCCCCCTCCCGTGCCCCGTCCSCGGTGCGCGGGCGGGGGGCGGCCGGAGCGCCTCACCTACAAAACGACTCTCGGCAACGGATATCTCGGCTCTCGCATCGATGAAGAACGTAGCGAAATGCGATACTTGGTGTGAATTGTAGAATCCCGTGAACCATCTAGTCTTTGAACGCAAGTTGCGCCCGAAGCCCCCGGGCCGAGGGGACGCCTGCCTGGGCGTCACGCATCCCCCCGCCCCGCGGGGGCGCGGAGAATGGCCTCCCGTGCGCCCCGGCGCGCGGCCGGCCCAAATGCGATCCCCCGGCGGCGTC…
	Barleria_strigosa -CCTGAACGAGCAGACCGCGAACGCGAACGAACCCCGGCGCGGAAAGCGCCAAGGAAAACCGAAACGGAGCCCCCGCCCGAGCCCCGTCCGCGGSGCGCGCGCGGGGGCGGTCCGGAGCGCCTCGGCGACAAAACGACTCTCGGCAACGGATATCTCGGCTCTCGCATCGATGAAGAACGTAGCGAAATGCGATACTTGGTGTGAATTGCAGAATCCCGTGAACCATCGAGTCTTTGAACGCAAGTTGCGCCCGAAGCCTTCGGGCCGAGGGCACGCCTGCCTGGGCGTCACGCATCCCCCCGCCCCGCGGGGGCGCGGAGATTGGCCTCCCGTGCGCCTCGGCGCGCGGCCGGCCCAAACGCGATCCCCCGGCGGCGTCC…
	Barleria_subregularis ---------------------------------------------------------------------------------------------------------------------------------------------------------------CTC?CGCATAGATGAAGAACGTAGCGAAATGCGATACTTGGTGTGAATTGCAGAATCCCGTGAACCATCGAGTCTTTGAACGCAAGTTGCGCCCGAGGCCCCCGGGCCGAGGGCACGCCTGCCTGGGCGTCACGCATCCCCCCGCCCCGCGGGGGAGCGGAGAATGGCCTCCCGTGCGCCCCGGCGCGCGGCCGGCCCAAATGCGATCCCCCGGCGGC…
	Barleria_taitensis GCCTCGGCGAGCAGACCGCGAACGCGAACGAACCCCGGCGCGGAAAGCGCCAAGGAAAACCGTAACGGAGCCCCMGCCCGAGCCCCGTCCGCGGGCCGCGGGCCGGGGCCGGCCGGAGCGCCTCACGGACAAAACGACTCTCGGCAACGGATATCTCGGCTCTCGCATCGATGAAGAACGTAGCGAAATGCGATACTTGGTGTGAATTGCAGAATCCCGTGAACCATCGAGTCTTTGAACGCAAGTTGCGCCCGAAGCCTTCGGGCCGAGGGCACGCCTGCCTGGGCGTCACGCATCCCCCCGCCCCGCGGGGGTGCGGAGAATGGCCTCCCGTGCGCCCCGGCGCGCGGCCGGCCCAAATGCGATCCCCCGGCGGCGTC…
	Barleria_trispinosa GCCTGCGCGAGCAGACCGCGAACGCGAACGAACCCCGGCGCGGAACGCGCCAAGGAAAACACGAGCGAAGCCCCCGCCCGAGCCCCGTCCGCGG-GCGTCGGCGGGGGGCGGCCGGAGCGCCTCCGGCGCAGAACGACTCTCGGCAACGGATATCTCGGCTCTCGCATCGATGAAGAACGTAGCGAAATGCGATACTTGGTGTGAATTGCAGAATCCCGTGAACCATCGAGTCTTTGAACGCAAGTTGCGCCCGAGGCCCTCGGGCCGAGGGCACGCCTGCCTGGGCGTCACGCATCCCCCCGCCCCGCGGGGGAGCGGAGAATGGCCTCCCGTGCGCCCCGGCGCGCGGCCGGCCCAAATGCGATCCCCCGGCGGCGC…
	Barleria_ventricosa GCCTCAACGAGCAGACCGCGAACGCGAACGAACCCCGGCGCGGAAAGCGCCAAGGAAAAC?GTAACGAAGCCCCCGCCCGAGCCCCGTCCGCGGTGCGCGGGCGGCGGCGGTCCGGAGCGCCTCATCTACAAAACGACTCTCGGCAACGGATATCTCGGCTCTCGCATCGATGAAGAACGTAGCGAAATGCGATACTTGGTGTGAATTGCAGAATCCCGTGAACCATCGAGTCTTTGAACGCAAGTTGCGCCCGAAGCCTTCGGGCCGAGGGCACGCCTGCCTGGGCGTCACGCATCCCCCCGCCCCGAGGGGGTGCGGATACTGGCCTCCCGTGCGCCCCGGCGCGCGGCCGGCCCAAATGCGATCCCCCGGCGGCGT…
	Barleria_whytei GCCTGAACGAGCAGACCGTGAACGCGAACGAACCCCGGCGCGGAAAGCGCCAAGGAAAACCCGAACGAAGCCCCCGCCCGAGCCCCGTCCGCGGTGCGCGTGCGGGGGCGGCCCGGAGCGCATCATCTACGTAACGACTCTCGGCAACGGATATCTCGGCTCTCGCATCGATGAAGAACGTAGCGAAATGCGATACTTGGTGTGAATTGCAGAATCCCGTGAACCATCGAGTCTTTGAACGCAAGTTGCGCCCGAAGCCTTCGGGCCGAGGGCACGCCTGCCTGGGCGTCACGCATCCCCCCGTCCCGCGGGGGTGCGGAGACTGGCCTCCCGTGCGCCGAGGCGCGCGGCCGGCCTAAATGCGATCCCCCGGCGGCGTCCGT…
	Barleria_wilmsiana GCCTGGACGAGCAGACCGCGAACGCGAACGAACCCCGGCGCGGAGAGCGCCAAGGAAAACCGTAACGAAGCCCCCGCCCGAGCCCCGTCCGCGGTGCGCGGGCGGCGGGCGGCCGGAGCGCCTCCAAACCTGAACGACTCTCGGCAACGGATATCTCGGCTCTCGCATCGATGAAGAACGTAGCGAAATGCGATACTTGGTGTGAATTGCAGAATCCCGTGAACCATCGAGTCTTTGAACGCAAGTTGCGCCCGAAGCCCCCGGGCCGAGGGCACGCCTGCCTGGGCGTCACGCATCCCCCCGCCCCGAGGGGGAGCGGAGAATGGCCTCCCGTGCGCCCCGGCGCGCGGCCGGCCCAAATGCGATCCCCCGGCGGCGCC…
	Crabbea_acaulis -------------GCGCGCGACCGTGAACGAACCCCGGCGCGGAACGCGCCAAGGAAAACCGAAACGAAGCCCCCGTCCGTGCCCCGTCCGCGGTGCGCGGGCGGGGGAGTCGC---GCGCCTCACGAACAAAACGACTCTCGGCAACGGATATCTCGGCTCTCGCATCGATGAAGAACGTAGCGAAATGCGATACTTGGTGTGAATTGCAGAATCCCGTGAACCATCGAGTCTTTGAACGCAAGTTGCGCCCGAAGCCTTCGGGCCGAGGGCACGCCTGCCTGGGCGTCACGCATCCCCCCTCCCCGCGGTGGGGCGGAGAGTGGCCTCCCGTGCGCCCCGGCGCGCGGCCGGCCCAAATGCGATCCCCCGGCGGCGCTCGT…
	Crabbea_migiurtina GCTCG---------------------AACGAACCCCGGCGCCGAACGCGCCAAGGAATACCGAAACGGAGCCCCCGTCCGCGTCCCGTCCGCGGTGCGCGGGCGGGGGGTGCGC---GCGCCTCACGT????????????????????????????????????????????????????????????????????????????????????????????????????????????????????????????????????????????????????????????????????????CCCCCCTCCCCGCGGGG--GCGGAGACTGGCCTCCCGTGCGCCC?GGCGCGCGGCCGGCCCAAATGCGATCCCCCGGCGGCGCG…
	Crabbea_thymifolia GCCCG---------------------AACGAACCCCGGCGCGGAACGCGCCAAGGAATACCGAAACGGAGCCCCCGTCCGCGCCCCGTCCGCGGTGCGCGGGCGGGGG--GTTGCGCGCGCCTCACGAACACAACGACTCTCGGCAACGGATATCTCGGCTCTCGCATCGATGAAGAACGTAGCGAAATGCGATACTTGGTGTGAATTGCAGAATCCCGTGAACCATCGAGTCTTTGAACGCAAGTTGCGCCCGAAGCCTTCGGGCCGAGGGCACGCCTGCCTGGGCGTCACGCATCCCCCCCTCCCGCGGGG--GCGGAGACTGGCCTCCCGTGCGCCCCGGCGCGCGGCCGGCCCAAATGCGATCCCCCGGCGGCGCG…
	Lasiocladus_villosus -------------------------------------------------------------------------------------------------------------------------------------------------------------------------------------------------------------------------------------------------------------------------------------------------------------------TCGAGGGGGCGGAGAGTGGCCCTCCGTGCGCCCCGGCGCGCGGCCGGCCCAAATGCGATCCCCCGGCGGCG…
	Lepidagathis_chiapensis -----------------GCGCACGCGAACGAACCCCGGCGCGGAAGGCGCCAAGGAAAACCGTAACGAAGCCCCCGCCCGCGCCCCGTCCGCGGTGTGCGGGCGGGGGTCGG-CGGAGCGCCTCATCAACAGAACGACTCTCGGCAACGGATATCTCGGCTCTCGCATCGATGAAGAACGTAGCGAAATGCGATACTTGGTGTGAATTGCAGAATCCCGTGAACCATCGAGTCTTTGAACGCAAGTTGCGCCCGAAGCCCTCGGGCCGAGGGCACGCCTGCCTGGGCGTCACGCATCCCCCCTCCCCGCGGGGGCGCGGACACTGGCCTCCCGTGCGCCTCGGCGCGCGGCCGGCCCAAATGCGATCCCCCGGCG…
	Lepidagathis_scabra -----------------GCGCGCGCGAACGAACCCCGGCGCGGAAAGCGCCAAGGAAAACAGTAACGAAGCCCCCGCTCGCGCCCCGTCCGCGGTGTGCGGGCGGGGGTCGG-CGGAGCGCCTCATCAACAAAACGACTCTCGGCAACGGATATCTCGGCTCTCGCATCGATGAAGAACGCAGCTA-----------------------------CCCGTGAACCATCGAGTCTTTGAACGCAAGTTGCGCCCGAAGCCCTCGGGCCGAGGGCACGCCTGCCTGGGCGTCACGCATCCCCCCKCCCCGCGGGGGTGCGGAAACTGGCCTCCCGTGCGCCTCGGCGCGCGGCCGGCCCAAATGCGATCCCCCGGCGGCGC…
	Lepidagathis_uxpanapensis -----------------GCGCACGCGAACGAACCCCGGCGCGGAAAGCGCCAAGGAAAACCGTAACGAAGCCCCCGTCTGCGCCCCGTCCGCGGTGTGCGGGCGGGGGTCGG-CGGAGCGCCTCATCAACAAAACGACTCTCGGCAACGGATATCTCGGCTCTCGCAT?GATGAAGAACGTAGCGAAATGCGATACTTGGTGTGAATTGCAGAATCCCGTGAACCATCGAGTCTTTGAACG?AAGTTGCGCCCGAAGCCCTCGGGCTGAGGGCACGCCTGCCTGGGCGTCACGCATCCCCCCTCCACGCGGGGGCGCGGACACTGGCCTCCCGTGCGCCTCGGCGCGCGGCCGGCCCAAATGCGATCCCCCGG…
;
END;
